1 **ILT7 activation and plasmacytoid dendritic cell response are governed by BST2**  
2 **determinants that are structurally-distinct**

3

4

5

6 Mariana G. Bego<sup>1</sup>, Nolwenn Miguet<sup>2</sup>, Alexandre Laliberté<sup>1</sup>, Nicolas Aschman<sup>2</sup>, Francine Gerard<sup>2</sup>,  
7 Angelique A. Merakos<sup>1</sup>, Winfried Weissenhorn<sup>2</sup> and Éric A. Cohen<sup>1,3\*</sup>

8

9

10

11 <sup>1</sup>Institut de Recherches Cliniques de Montréal (IRCM), Montreal, Quebec, Canada, H2W 1R7

12 <sup>2</sup>Univ. Grenoble Alpes, Institut de Biologie Structurale (IBS), CEA, CNRS, 38044 Grenoble, France

13 <sup>3</sup>Department of Microbiology, Infectiology and Immunology, Université de Montréal, Montreal, Quebec,  
14 Canada, H3T 1J4

15

16

17

18

19 **Contact information:**

20 Mariana G. Bego: [mariana.bego@ircm.qc.ca](mailto:mariana.bego@ircm.qc.ca)

21 Nolwenn Miguet: [nolwenn.miguet@ibs.fr](mailto:nolwenn.miguet@ibs.fr)

22 Alexandre Laliberté: [alexandre.laliberte@ircm.qc.ca](mailto:alexandre.laliberte@ircm.qc.ca)

23 Nicolas Aschman: [nicolas.aschman@education.lu](mailto:nicolas.aschman@education.lu)

24 Francine Gerard: [francine.gerard@ibs.fr](mailto:francine.gerard@ibs.fr)

25 Angelique A. Merakos: [angelique.a.merakos@gmail.com](mailto:angelique.a.merakos@gmail.com)

26 Winfried Weissenhorn: [winfried.weissenhorn@ibs.fr](mailto:winfried.weissenhorn@ibs.fr)

27

28

29

30

31

32 **\*Correspondence: Éric A. Cohen**

33 Laboratory of Human Retrovirology, Institut de Recherches Cliniques de Montréal, 110, Pine Avenue  
34 West, Montreal, Quebec, Canada, H2W 1R7.

35 Phone: (514) 987-5804 / Fax: (514) 987-5691

36 E-mail address: [eric.cohen@ircm.qc.ca](mailto:eric.cohen@ircm.qc.ca)

37 **Abstract**

38 The interaction of the human pDC receptor ILT7 with its ligand, BST2, significantly regulates pDC's  
39 TLR-induced innate immune responses. This interaction has critical biological consequences, yet, its  
40 structural requirements are not fully characterized. The BST2 ectodomain can be divided in structurally  
41 and functionally distinct regions; while the coiled-coil region contains a newly-defined ILT7 binding  
42 surface, the N-terminal region appears to negatively modulate ILT7 activation. A stable BST2  
43 homodimer binds to ILT7 but post-binding events associated to the unique BST2 coiled-coil plasticity  
44 are required to trigger receptor signaling. Hence, BST2 with an unstable or with a rigid coiled-coil fails  
45 to activate ILT7, whereas mutations in the N-terminal region enhance activation. Importantly, the  
46 biological relevance of these newly defined domains of BST2 is underscored by the identification of  
47 mutations with opposed potential to activate ILT7, which are selected under pathological malignant  
48 conditions.

## 49 **Introduction**

50 Type I interferons (IFN-I) are key soluble antiviral molecules that are predominantly produced by  
51 activated plasmacytoid dendritic cells (pDCs)<sup>1</sup>. Their functions reach far beyond their established role  
52 during antimicrobial defense as IFN-I are also linked with regulation of immune cell differentiation,  
53 survival and homeostasis as well as control of the cell cycle<sup>2-4</sup>. Hence, IFN-I play an important role in  
54 orchestrating the natural immune response to cancer and have inhibitory functions that prevent  
55 malignant cellular transformation (reviewed in Zitvogel, et al<sup>5</sup>). However, their biological activities can  
56 also have deleterious impacts on surrounding healthy cells. Prolonged IFN-I signaling is associated to  
57 excessive inflammation and immune dysfunction<sup>6</sup> and high levels of IFN-I contributes to aberrant  
58 immune activation and development of autoimmune diseases<sup>7</sup>. Furthermore, IFN-Is can also act as a  
59 double-edged sword when fighting malignant invasive tumors, with the potential to deploy opposite anti-  
60 and pro-tumorigenic outcomes given their direct impact on tumor cells and potentially improper activity  
61 on tumor infiltrating immune cells<sup>8</sup>. Thus, IFN-I production and signaling need to be tightly regulated to  
62 achieve protective immunity during pathological conditions while avoiding harmful toxicity caused by  
63 improper or prolonged IFN signaling.

64 One way to control IFN-I production involves the engagement of pDC-specific regulatory receptors  
65 BDCA-2 (CD303) and ILT7 (LILRA4, CD85g). Crosslinking of either regulatory receptor efficiently  
66 suppresses the production of IFN-I and other cytokines in response to toll-like receptor 7 and 9 (TLR7/9)  
67 activation<sup>9,10</sup>. Interestingly, the natural ligand of ILT7 was found to be BST2 (bone-marrow stromal cell  
68 antigen 2), a membrane-associated protein that is itself induced by IFN-I<sup>11</sup>. Given the IFN-I-inducible  
69 nature of the ILT7 ligand, it was proposed that BST2 contributes to a negative feedback mechanism  
70 controlling IFN-I overproduction by pDCs after viral infection and/or sustained inflammatory responses<sup>11-  
71 14</sup>. Remarkably, BST2 expression is constitutively elevated in various cancers such as myelomas, lung  
72 cancer, breast cancer, colorectal cancer, and pancreatic cancer<sup>15</sup>. Indeed, constitutive expression of  
73 BST2 by human breast cancer cell line and melanoma lines was shown to suppress IFN-I production  
74 by pDC via ILT7, raising the possibility that the interaction of BST2 with ILT7 might be contributing to  
75 tumor immune suppression and pDC-tumor crosstalk<sup>14</sup>.

76 BST2 is a small, evolutionary conserved, single-pass type II membrane protein. It has a unique topology  
77 as its ectodomain is anchored to the plasma membrane via a N-terminal transmembrane domain and a  
78 C-terminal glycosylphosphatidylinositol (GPI) anchor<sup>16</sup> (Fig. 1A). BST2 contains a short cytoplasmic tail  
79 involved in NF- $\kappa$ B signaling and AP-2-dependent endocytosis<sup>17,18</sup>. The protein is heavily glycosylated on  
80 two conserved extracellular asparagine residues (N65 and N92) and forms a stable disulfide-linked dimer  
81 via any of the three conserved cysteine residues located towards the N-terminal region of the ectodomain  
82 (C53, C63 and C91)<sup>16,19-22</sup>.

83 The structure of the human and mouse BST2 ectodomain dimers have been solved by X-ray  
84 crystallography. Each monomer consists of a continuous alpha helix organized in parallel orientation,  
85 forming a homodimer with a coiled-coil structure stabilized by intermolecular disulfide linkages<sup>23-26</sup>.  
86 Biophysical studies indicate that the recombinant coiled-coil BST2 ectodomain dimer exists as a rod-like  
87 structure of 15 to 17nm in length with a slight bend at about one third from its N-terminus<sup>26,27</sup>. The  
88 ectodomain dimer is hinged at two positions (A88 and G109 in the human protein), giving the N-terminus  
89 a degree of rotational flexibility<sup>24-26</sup>. In both species, the ectodomain two-third C-terminal region is  
90 arranged as a parallel dimeric coiled-coil formed by 6–7 heptad repeats starting at position C91<sup>23-26</sup>. The  
91 presence of a number of destabilizing residues in key central heptad positions confer the ectodomain  
92 coiled-coil its characteristic dynamic instability that requires intermolecular disulfides for stability<sup>23</sup>. Such  
93 an evolutionary conserved design was proposed to provide the BST2 dimer an inherent plasticity that  
94 allows the protein to adapt during dynamic events<sup>23,27</sup>.

95 BST2 is a multifaceted protein. It is also referred as ‘tetherin’, as it acts as a broad antiviral restriction  
96 factor through its ability to physically retain enveloped viruses at the cell surface, thus preventing their  
97 release from infected cells<sup>28,29</sup>. We recently reported that while ‘tethering’ human immunodeficiency virus  
98 type 1 (HIV-1), BST2 is unable to interact with ILT7 and block IFN-I production by pDCs<sup>30</sup>. Remarkably,  
99 the pandemic HIV-1 group M has evolved mechanisms to maintain BST2-ILT7 interaction and limit pDC  
100 activation despite its ability to effectively counteract BST2 for efficient HIV-1 release<sup>30</sup>. This property,  
101 which limits pDC antiviral responses, was not conserved in the endemic HIV-1 group O<sup>30,31</sup>. While the  
102 domains and structural features of BST2 required for tethering HIV-1 have been precisely  
103 defined<sup>22,23,28,32,33</sup>, the determinants required for engaging and activating ILT7 are largely undefined.

104 Understanding the structural features of BST2 that are required to engage and activate ILT7 may guide  
105 the development of new therapeutic options aimed at restoring pDC functionality and triggering IFN-I  
106 production to induce effective antitumor or antiviral immunity.

107 Using functional assays measuring ILT7 activation by BST2 as well as biophysical studies of BST2  
108 interaction with ILT7, we show that the structurally distinct N- and C-terminal regions of BST2 ectodomain  
109 have discrete functions during ILT7 activation. While the unique and highly conserved C-terminal coiled-  
110 coil region of BST2 contains key residues required for ILT7 binding, the N-terminal and its central  
111 connecting flexible region acts as a modulatory region negatively regulating ILT7 activation. Indeed, we  
112 provide evidence that after the initial interaction, the coiled-coil internal flexibility is required for ILT7  
113 activation suggesting a post-binding conformational rearrangement of the BST2/ILT7 complex. We  
114 further demonstrate that a stable BST2 homodimer is required to trigger ILT7 activation and that both  
115 BST2 monomers need to have intact ILT7-binding surface for this function. Importantly, analysis of  
116 somatic mutations identified in particular tumor tissues and mapping to these newly defined BST2  
117 functional domains reveals that specific genetic changes in BST2 are capable of either greatly enhancing  
118 ILT7-mediated suppression of IFN-I production or completely abrogating this phenotype, thus  
119 underscoring the clinical relevance of our findings.

120

## 121 **Results**

122 ***The highly conserved coiled-coil region of BST2 is required for ILT7 activation.*** We previously  
123 demonstrated that the BST2 ectodomain is sufficient to interact with ILT7 and activate its inhibitory  
124 signaling cascade<sup>30</sup>. To identify the determinants in BST2 ectodomain required for ILT7 activation we  
125 used two previously described co-culture assays, namely a reconstituted ILT7 reporter assay and a  
126 PBMC-based assay (Fig. 1B). The first functional assay relies on a mouse NFAT-GFP reporter cell line,  
127 which also expresses human ILT7 and the mouse FcεR1γ chain (CT550) such that levels of GFP  
128 expression directly correlates with the degree of BST2-mediated ILT7 activation<sup>10,11</sup>. Selected BST2  
129 mutants were also tested in a PBMC-based co-culture assay, which directly measures the quantity of  
130 IFN-I produced by PBMCs after TLR7 agonist stimulation following engagement and activation of the  
131 ILT7 pathway in pDCs by BST2<sup>30,34</sup>. Given that the extent of ILT7 activation is directly proportional to the

132 surface levels of BST2 expressed on co-cultured 293T targets cells<sup>30</sup>, expression of all BST2 mutants  
133 was standardized to match that of the internal BST2 WT control (Fig. S1). A series of alanine substitution  
134 mutants starting at amino acid position 47 and continuing through position 150<sup>32</sup>, where each mutant in  
135 the panel incorporates four consecutive alanine residues, was used to identify determinants required for  
136 ILT7 activation. HEK-293T cells expressing BST2 (WT or mutants) were co-cultured with ILT7<sup>+</sup> NFAT-  
137 GFP reporter cells prior to flow cytometry analysis. The alanine scan analysis revealed two discrete  
138 domains in BST2 that modulate ILT7 activation. A first region spanning residues 47 to 90 appeared to  
139 act as a modulatory domain as alanine substitutions enhanced BST2-mediated ILT7 activation. In  
140 contrast, a second region overlapping the BST2 coiled-coil domain from residues 91 to 147 seemed to  
141 have a direct role in ILT7 activation as many alanine mutations resulted in a strong impairment of the  
142 ILT7 activation phenotype (Fig. 1C-D).

143 ***A surface required for ILT7 activation is defined by two spatially adjacent residues within the***  
144 ***BST2 coiled-coil.*** We confirmed that the BST2 coiled-coil region was sufficient to interact with ILT7 by  
145 surface plasmon resonance *in vitro* ( $K_D=2.62 \mu\text{M}$ ) using recombinant GST-tagged truncated BST2  
146 (residues 80 to 147) and baculovirus-expressed soluble ILT7 (Fig. 2A). The primary structure of the  
147 coiled-coils is characterized by a periodicity of seven residues or heptad repeat pattern, which are usually  
148 labeled *abcdefg*. Heptad positions *a* and *d* (typically hydrophobic residues) form the core present at the  
149 interface of the two helices, while *e* and *g* positions (typically charged residues) form inter-helical ionic  
150 interactions and are all involved in dimer stabilization<sup>35,36</sup>. Some of the alanine residues introduced during  
151 the alanine scan could potentially disrupt the stability of the coiled-coil structure, especially those that  
152 substitute amino acid residues located at the center of the  $\alpha$ -helix (heptad positions *a* and *d*) or those  
153 involved in stabilizing inter-helical bonds (heptad positions *e* and *g*; Fig. 2B-C). Furthermore, as the BST2  
154 ectodomain parallel dimer is anchored to the plasma membrane at both ends, at least one of the heptad  
155 positions *e* or *g* is most probably buried as it is facing the cell surface (Fig. 2C). We therefore reasoned  
156 that only heptad positions *b*, *c* and *f* are more likely to be exposed for interaction with ILT7. Based on  
157 these predictions, we selected potentially exposed non-alanine residues, which were part of the  
158 quadruple alanine scan null mutants, for individual studies (Fig. 2B-C). Several mutations had a slight to  
159 severe ILT7 activation phenotype impairment, but two BST2 mutants, D129A and R136A, completely  
160 lost their ability to activate ILT7 (Fig. 3A-B). The defective phenotype of BST2 D129A and R136A mutants

161 was confirmed using the PBMC-based assay. As expected, upon engagement of BST2 WT with ILT7,  
162 IFN-I production was significantly reduced in the co-culture (Fig. 3C and S2). In agreement with the lack  
163 of ILT7 activation observed using the ILT7 reporter assay, BST2 D129A and R136A mutants were unable  
164 to significantly trigger a repression suppression of the IFN-I pathway triggered through TLR7 activation  
165 (Fig. 3C and S2). Interestingly, the two mutated residues, D129 and R136 are located in adjacent c  
166 heptad positions (Fig. 2C) and as such could form a potential ILT7-binding surface in the secondary  
167 structure of BST2 (Fig. 3D).

168 ***BST2 coiled-coil dynamic instability is important to modulate ILT7 activation.*** Alanine substitutions  
169 of residues 63 to 78 in the N-terminal domain of BST2 enhanced ILT7 activation by 3- to 5-fold (Fig. 1D).  
170 This same region was previously shown to display pronounced flexibility in the context of BST2 dimers  
171 and to act as the core of a putative antiparallel 4-helix bundle made by two BST2 parallel dimers under  
172 reducing conditions<sup>24,25</sup>. A single residue mutant in this region, L70D, was sufficient to disrupt tetramers  
173 without affecting the formation of BST2 dimers under reducing condition but had only limited effects on  
174 BST2 antiviral activity<sup>24</sup>. When tested in the ILT7 reporter assay, substitution of leucine residue at  
175 position 70 for aspartic acid significantly enhanced activation (Fig. 4A-B). Interestingly, this mutant  
176 behaved just as BST2 WT in the PBMC-based assay (Fig. 4C). Given the structural feature displayed  
177 by this region, the L70D mutation could also have long range effects on the dynamic of the coiled-coil  
178 region. Crystal structure models from Schubert and colleagues suggest that residue L70 is buried in a  
179 hydrophobic core stabilizing the BST2 dimer<sup>24</sup>. It is therefore possible that disrupting a strong  
180 hydrophobic core within the N-terminus end of the dimer by adding a charged residue would provide  
181 more flexibility to the C-terminus coiled-coil domain. In order to test whether the dynamic instability of  
182 the BST2 coiled-coil plays a role in ILT7 activation, we incorporated two cysteines at positions L127  
183 (L127C) and V134 (V134C) predicted to be close enough in the dimer to allow formation of disulfide  
184 bonds (Fig. 4D). As predicted, restricting the plasticity of the BST2 coiled-coil region significantly reduced  
185 ILT7 activation in the ILT7 reporter assay as well as in the PBMC-based assay (Fig. 4A-C). These results  
186 highlight the importance of BST2 coiled-coil characteristic of dynamic instability for ILT7 activation and  
187 suggest that the N-terminal domain might impose a structural constraint on the coiled-coil dynamic.

188 ***ILT7 activation requires a structurally stable BST2 dimer.*** Although there are three disulfide bonds  
189 (C53, C63 and C91) stabilizing the BST2 dimer<sup>24-26</sup>, none of the three individually is required for BST2

190 antiviral function<sup>21,22</sup>. Loss of cysteines at position 53 and 63 did not affect the ability of BST2 to activate  
191 ILT7 (Fig. 5A-B). On the other hand, loss of cysteine residue at position 91 drastically reduced ILT7  
192 activation. Indeed, any combination that included a mutation at cysteine residue 91 displayed a strong  
193 defect in ILT7 activation (Fig. 5A-B). Of note, N-acetylglucosamine residues at position N92 are  
194 postulated to be perpendicular to the C91–C91 disulfide bond<sup>24</sup>. Interestingly, while N-glycosylation sites  
195 were not required for ILT7 activation, disrupting C91 disulfide bond in absence of glycosylation at position  
196 92, restored BST2-mediated ILT7 activation to BST2 WT levels (Fig. 5A-B). Nevertheless, the stabilizing  
197 role of the disulfide bonds was found to be required for ILT7 activation as mutation N92Q could not  
198 rescue activation when the three cysteines were mutated (Fig. 5A-B). In agreement with the ILT7 reporter  
199 cell assay, BST2 C91A mutant was unable to significantly trigger the ILT7-dependent IFN-I repression  
200 pathway in PBMCs, while no significant differences were observed between BST2 WT and the  
201 C91A/N92Q mutant (Fig. 5C). These results indicate that although the structural stability of the BST2  
202 dimer conferred by the disulfide bonds is critical for BST2-mediated ILT7 activation, the disulfide bond  
203 specifically formed through Cys 91 might also contribute to the proper orientation of a neighboring highly  
204 glycosylated site that otherwise could impair BST2-ILT7 engagement.

205 Given that a stable BST2 dimer is required to activate ILT7 and that the ILT7 coreceptor, FcεRIγ, requires  
206 dimerization for proper activation<sup>37</sup>, we investigated whether ILT7 activation requires the engagement of  
207 two functionally active units within the BST2 dimer. Using a double inverse gradient of expression of  
208 BST2 WT versus the R136A null mutant, we determined that only homodimers of BST2 WT are capable  
209 of activating ILT7 while heterodimers between BST2 WT and the R136A mutant are inactive (Fig. 6 A-  
210 B, S3A). To support these findings, we demonstrated by co-immunoprecipitation assay that BST2 WT  
211 was capable of forming dimers with BST2 mutant R136A as efficiently as with BST2 WT (Fig. S3B).  
212 These findings indicate that two functionally active units of BST2 forming a stable dimer are required to  
213 activate ILT7.

214 **Natural variants of BST2 exhibit distinct ILT7 activation phenotypes.** To examine if the BST2  
215 functional domains identified so far can be affected *in vivo*, several natural variants of BST2 were  
216 analyzed, including single nucleotide polymorphisms (SNP) and somatic mutations associated to specific  
217 cancers (Fig. 7A, Table S1). Most of the SNP tested were comparable to BST2 WT for ILT7 activation;  
218 however, three SNPs, namely D103N, E117A and D129E, the latter revealing a substitution at the critical



219 D129 residue for a conserved charged amino acid, exhibited a partially impaired ILT7 activation  
220 phenotype (Fig. 7B). Likewise, three of the somatic mutations tested (E62G-hepatocellular carcinoma,  
221 Q110H-ovarian cancer and S145R-lung cancer) activated ILT7 to the same extent as BST2 WT.  
222 Interestingly, one somatic mutation (E119K-melanoma) located in the coiled-coil domain was completely  
223 defective while three somatic mutations identified in distinct cancer tissues (C63Y-uterine cancer, Q87H-  
224 colon cancer and T90P-breast cancer) and mapping outside of the coiled-coil structure exhibited  
225 enhanced activation capacities (Fig. 7B). In agreement with the ILT7 reporter assay, mutation E119K  
226 was completely defective in the PBMC assay (Fig. 7C). Based on its heptad *g* position (Fig. 2C), it is  
227 predicted that the charge alteration at this position would have a very detrimental effect on the overall  
228 coiled-coil stability, further highlighting the importance of the integrity of this structure for ILT7 activation.  
229 However, in contrast to the BST2 C63Y and T90P mutants that behaved just as WT in this assay, BST2  
230 Q87H strongly repressed IFN-I production (Fig. 7B-C). Taken together these results suggest that variants  
231 of BST2 with opposed potential to activate ILT7 can be found *in vivo* and be selected under pathological  
232 malignant conditions.

233 ***Post-binding events associated to BST2 coiled-coil plasticity are required to activate ILT7.*** To  
234 further understand the molecular mechanism underlying ILT7 activation by BST2, we analyzed the  
235 binding strength of selected BST2 mutants to ILT7 using microscale thermophoresis (MST). The  
236 recorded binding strength of BST2 WT ectodomain to ILT7 ectodomain by MST (Fig. 8 and Fig. S4,  
237  $K_D=2.45 \pm 0.3 \mu\text{M}$ ) was remarkably similar to that we previously reported using surface plasmon  
238 resonance (SPR) ( $K_D=2.33 \mu\text{M}^{30}$ ). Mutations in the postulated ILT7-binding surface, BST2 D129A and  
239 R136A, that failed to activate ILT7 in the reporter assay and in the PBMC-based assay exhibited no  
240 binding to ILT7 by MST, validating these residues as critical for ILT7 binding (Fig. 8A and Fig. S4A).  
241 Interestingly, mutation L127C, which prevented BST2 activation of ILT7 in both functional assays by  
242 presumably limiting the plasticity of the coiled-coil, interacted with ILT7 with comparable strength than  
243 BST2 WT (Fig. 8B and Fig. S4B,  $K_D=6.45 \pm 1.2 \mu\text{M}$ ), implying that binding to ILT7 is required but not  
244 sufficient to induce activation of the inhibitory receptor. MST analysis of BST2 mutants that enhanced  
245 ILT7 activation in the reporter assay (L70D, T90P and Q87H) and in the PBMC assay (Q87H) revealed  
246 that none of these mutants displayed enhanced binding affinities. Indeed, these three mutants had  $K_D$   
247 values in the lower micromolar range as BST2 WT, although with different thermophoresis (Fig. 8C-D

248 and Fig. S4C-D, Q87H  $K_D=5.06 \pm 1.1 \mu\text{M}$ ; L70D  $K_D=5.55 \pm 1 \mu\text{M}$ ; T90P  $K_D=4.49 \pm 0.9 \mu\text{M}$ ). Whereas  
249 BST2 WT and the BST2 Q87H mutant displayed a difference in amplitude when in complex with ILT7,  
250 BST2 mutants L70D and T90P showed a difference in signal direction. Chemical cross-linking of  
251 constructs comprising the recombinant ectodomain revealed that all mutants tested still dimerized as  
252 indicated by the appearance of new bands migrating at molecular weights between 25 and 35 kDa (Fig.  
253 S4E), as previously reported<sup>26</sup>. To analyze the impact of the mutations on the folding and stability of the  
254 proteins, we examined the circular dichroism (CD) profiles of selected BST2 mutants and determined  
255 their thermostability (melting temperature,  $T_m$ ). CD analyses revealed that all mutants are highly  $\alpha$ -  
256 helical in solution, with a propensity to form alpha helices either very similar to BST2 WT (Q87H, L127C)  
257 or just slightly reduced (70-90% helical content remaining for D129A, R136A, L70D and T90P; Fig. S5,  
258 left panels). Analysis of the thermostability showed that while most mutants (D129A, L70D, Q87H and  
259 T90P) displayed melting temperature similar to BST2 WT ( $\sim 61^\circ\text{C}$ ), mutants harboring substitutions at  
260 residues L127 or R136 in the coiled-coil domain exhibited a reduced thermostability with  $T_m$  values of  
261  $\sim 53^\circ\text{C}$  and  $\sim 54^\circ\text{C}$ , respectively (Fig. S5, right panels). Despite the lower helical content and reduced  
262 thermostability of some of the mutants, none of these mutations completely lost the integrity of the coiled-  
263 coil structure, as observed for instance under reducing condition when the  $T_m$  drops to as low as  $\sim 35^\circ\text{C}$   
264 <sup>26</sup>. Taken together, these results validate that post-binding events are governing the extent of ILT7  
265 activation by BST2.

266

## 267 **Discussion**

268 The interaction of the human pDC receptor ILT7 with its ligand, BST2, has important biological  
269 implications as it significantly regulates pDC's TLR-induced innate immune responses during  
270 inflammatory injuries, a function that can be diverted in disease states<sup>11,30,38</sup>. However, the structural  
271 determinants and functional features of BST2 that govern ILT7 engagement and activation are still  
272 largely undefined. Our mutagenic studies of the BST2 ectodomain combined with biophysical analysis  
273 of recombinant mutant molecules identify two structurally distinct regions of the BST2 ectodomain that  
274 play divergent role during activation of ILT7. While the coiled-coil region of BST2 is found to contain  
275 amino acid residues required for binding ILT7, the flexible N-terminal region of the ectodomain appears

276 to act as a negative modulator of BST2-mediated ILT7 activation. Through analysis of specific mutants,  
277 we further demonstrate that binding of BST2 to ILT7 is not sufficient for activation of the receptor and  
278 provide evidence that post-binding structural rearrangements involving the coiled-coil structure are likely  
279 required to optimally trigger ILT7 signaling. Importantly, our results highlight the biological relevance of  
280 these newly defined domain of BST2 by establishing that mutations with opposed potential to activate  
281 ILT7 can be found *in vivo* and be selected under pathological malignant conditions.

282 The human BST2 coiled-coil is characterized by an inherent dynamic instability, which has been  
283 proposed to provide structural plasticity during dynamic events such as viral assembly and release<sup>24-27</sup>.  
284 Indeed, the integrity of the coiled-coil structure rather than its amino-acid sequence composition was  
285 found critical for optimal BST2 antiviral activity<sup>22,32,33</sup>. However, the presence of large patches of amino  
286 acid sequence conservation between human BST2 and its counterparts encoded by other primates  
287 suggest that the structure could also be important for a conserved cellular function involving a cell surface  
288 binding partner<sup>27</sup>. A role of the BST2 coiled-coil as a binding interface for the ILT7 receptor is indeed  
289 supported by our *in vitro* binding studies revealing that this structure is sufficient for binding ILT7 as well  
290 as by our alanine scan mutagenesis, which clearly demonstrate that mutations encompassing the coiled-  
291 coil drastically affect ILT7 activation. Targeted mutagenesis of amino-acid residues predicted to be  
292 exposed within the coiled-coil heptad repeats identify well conserved residues D129 and R136 as  
293 essential on their own for binding ILT7 and as expected inducing its activation. In the case of the aspartic  
294 acid residue at position 129, substitution for a similarly charged glutamic acid, was found still detrimental  
295 for ILT7 activation, pointing to a critical role of an aspartic residue at that position. The fact that the overall  
296 integrity of the coiled-coil appears minimally affected in both mutant, as shown by our biophysical  
297 analyses, and that they retain the ability to form dimers, suggests that these exposed residues in  
298 adjacent c positions might represent an ILT7-binding surface in BST2 although we cannot exclude the  
299 possibility that ILT7 contacts BST2 at two distinct sites. Interestingly, the requirement of two, rather than  
300 one, binding contacts was previously reported for ILT2 (also known as LIR-1 or LILRB1), another  
301 member of the ILT family, which binds HLA-A2<sup>39</sup>.

302 Previous structural and functional studies have highlighted the critical role of disulfide linkages in  
303 stabilizing the BST2 dimer as well as the necessity for disulfide cross-linking through at least one of the

304 three conserved cysteines for BST2 antiviral activity<sup>21,22,24-27</sup>. Our results demonstrate that the stabilizing  
305 role of disulfide bonds is required for ILT7 activation. They also reveal an essential role of cysteine 91  
306 as disulfide cross-linking at this position is predicted to prevent the detrimental effect of a neighboring  
307 asparagine residue on the BST2-mediated ILT7 activation. Interestingly, none of the other two cysteines,  
308 C53 and C63, were found to individually impact ILT7 activation, indicating that disulfide cross-linking at  
309 C91 might serve two functions: first, ensuring the proper structural orientation of the C-terminus of the  
310 ectodomain, and, second stabilizing the labile coiled-coil during dynamic processes of disassembly and  
311 reassembly, which confer a degree of conformational flexibility/plasticity to the molecule<sup>23</sup>. Restricting  
312 the dynamic process of the BST2 coiled-coil with engineered disulfide bonds predicted to be formed at  
313 positions 127 and 134 drastically impaired ILT7 activation without however impairing binding of BST2 to  
314 the receptor (at least with L127C). These results suggest that while binding of BST2 to ILT7 is required  
315 for induction of ILT7 signaling, it might not be sufficient. This phenotype raises the possibility that post-  
316 binding events associated to the plasticity of the BST2 coiled-coil might be required for ILT7 activation,  
317 although we cannot entirely exclude that the lack of ILT7 activation might result from the slightly reduced  
318 thermostability of the L127C mutant.

319 Alanine scan and targeted mutagenesis of the N-terminal domain of BST2 at amino acid residues 63, 70  
320 87 and 90 leads to an enhancement of ILT7 activation in the reporter assay without any major changes  
321 in the strength of binding to ILT7 (at least for the L70D, Q87H and T90P mutants). These results suggest  
322 that this region of BST2 might exert a structural constraint on the ectodomain of the molecule. They also  
323 support the notion that besides binding, other molecular events might qualitatively impact BST2-  
324 mediated ILT7 activation. Structural studies of BST2 reveal that the N-terminal domain of BST2 forms  
325 a continuous helix with the coiled-coil with an inherent constrained flexibility at a connecting hinge  
326 region, which is revealed as a bent structure by small angle X-ray scattering analysis<sup>26,27</sup>. However, the  
327 presence of both membrane anchors might constrain the ectodomain into one defined conformation.  
328 Thus, disrupting a strong hydrophobic core close to the N-terminus end of the dimer (L70D mutation)  
329 could provide more flexibility to the C-terminus coiled-coil portion by reducing the backbone torsion  
330 downstream. Similarly, introducing a sharp helix break with a proline before the start of the coiled-coil  
331 region (T90P mutation), physically disconnecting the two domains, might relieve this structural constrain  
332 and favor ILT7 activation.

333 On the basis of our analysis of the structure- function relationship of BST2 and the current literature, we  
334 propose the following model of BST2-mediated activation of the ILT7 pDC receptor. Two functionally  
335 active units of BST2 forming a stable dimer are required to activate ILT7. Upon binding of each BST2  
336 molecules to a single monomeric ILT7/FcεR1γ pair at either side of the dimeric coiled-coil, the two  
337 ILT7/FcεR1γ pairs are brought close enough to induce their dimerization, a process that is facilitated by  
338 the conformational flexibility of the coiled-coil structure. Once close enough, a potential disulfide bond  
339 formation linking the two FcεR1γ co-receptors would stabilize the entire complex as observed for the Fc  
340 receptor complex<sup>37</sup>. In this context, mutations D129A or R136A would prevent the initial binding while  
341 mutation L127C would limit the conformational flexibility of the coiled-coil required to displace the  
342 ILT7/FcεR1γ complexes close enough for dimerization and subsequent signaling to occur. Relieving the  
343 structural constrain exerted by the N-terminal on the ectodomain, as exemplified by mutant L70D or  
344 T90P, would make this step more efficient by lowering the energy transition required to mediate this  
345 conformational rearrangement, thus allowing a more effective activation of the ILT7 receptor. While this  
346 phenotype is observed in the reconstituted ILT7+ NFAT-GFP reporter cell assay (indicator cells are in  
347 are mouse hybridoma cell background), which might be more sensitive to structural changes that lower  
348 energy transitions, it was not detectable in the more physiological PBMC assay where formation of an  
349 active dimeric ILT7/FcεR1γ complex is likely more efficient and stable. Interestingly, a somatic mutation  
350 where glutamine 87 in the flexible connecting region was substituted for a histidine induced a significant  
351 increase of the ILT7 activation potential of BST2 in both assays, making it unlikely that this mutation  
352 caused this phenotype by lowering the energy transition of the predicted rearrangement step. The fact  
353 that the Q87H mutant binds ILT7 with an affinity comparable to WT BST2, rather suggests a potential  
354 role of the flexible connecting domain in modulating the quality of the BST2/ILT7 binding. Since the  
355 binding affinity of BST2 for the ILT7 receptor is rather low ( $K_D \sim 2.5 \mu\text{M}$ ), clustering of BST2 of a higher  
356 order might be required to fully trigger the ILT7 signaling cascade. Small-angle X-ray scattering (SAXS)  
357 analysis of human and mouse BST2 revealed features indicative that the BST2 ectodomain can form  
358 higher order associations in solution<sup>27</sup>. Accumulation of BST2 within plasma membrane microdomain at  
359 the point of contact with pDC would support the formation of such high order associations and mutations  
360 facilitating or limiting the magnitude of this clustering might impact BST2-mediated ILT7 activation. In  
361 support of this, cryo-EM studies demonstrate the clustering of BST2 at HIV-1 budding sites in the

362 absence of viral antagonist<sup>40,41</sup>. Yet, despite HIV-1 counteractions, which result in a reduction of surface  
363 BST2 and efficient viral particle release, BST2 is still incorporated into virions.<sup>22,42</sup> These observations  
364 provide indirect evidence that conditions not favoring the formation of high order associations render  
365 BST2 ineffective at restricting HIV-1 release.

366 The biological importance of ILT7 activation by BST2 has been difficult to study *in vivo* since this function  
367 is not conserved between human and mice, as there is no known murine ortholog for ILT7<sup>14</sup>. Moreover,  
368 although mouse and human BST2 ectodomains have an evolutionarily conserved unstable coiled-coil  
369 design, there is no actual amino acid sequence conservation<sup>27</sup> and the newly identified putative ILT7-  
370 binding surface is absent in rodent BST2. Indeed, paradoxically, BST2 knock-out mice showed reduced  
371 IFN-I secretion by murine pDCs<sup>43</sup>. Several previously identified naturally-occurring SNPs of BST2 in the  
372 human populations were investigated in the context of BST2 antiviral restriction and signaling. None of  
373 these sequence variants affected the ability of BST2 to restrict HIV-1 release while one variant, Q19H,  
374 selectively abolished the NF- $\kappa$ B-dependent signaling activity of BST2<sup>44</sup>. Most of these very rare missense  
375 variants of BST2 activated ILT7 as well as BST2 WT, thus highlighting the high conservation of this  
376 function in healthy individuals. On the other hand, it is well established that elevated BST2 levels are  
377 observed in many types of malignant cells<sup>15</sup>. The elevated BST2 mRNA levels observed in some  
378 metastatic and invasive tumors are a strong predictor of tumor size, aggressiveness and often associated  
379 with poor patient survival<sup>45,46</sup>. Nonetheless, BST2 is not elevated in all cancer tissues as significant  
380 downregulation was noted in particular cases, including B-cell acute lymphoblastic leukemia, liver, and  
381 prostate cancer<sup>15,47</sup>. Functional analyses of a selected number of BST2 ectodomain variants enriched in  
382 malignant cells when compared to healthy cells from the same individual reveal that most somatic  
383 mutations had no impact on BST2 activation except for two sequence variants, E119K and Q87H. The  
384 E119K variant found in melanoma abrogates ILT7 activation most likely by affecting the integrity of the  
385 coiled-coil structure. In contrast, the Q87H variant associated with colorectal cancer enhances the ILT7  
386 activating capacity of BST2. Thus, these variants could confer evolutionary advantages to the malignant  
387 tumors they are associated with by enabling them to modulate pDC's IFN-I responses and hence either  
388 escape IFN-I anti-tumor activity (Q87H) or promote IFN-I pro-tumorigenic potential (E119K)<sup>8,48</sup>.

389 The IFN system can mount an early and extremely powerful antiviral and antitumor response. By  
390 modulating the immune response at its foundation, IFNs can widely reshape immunity to control chronic  
391 infectious diseases and invading malignancies. A better understanding of the intimate interplay between  
392 BST2 and ILT7 can open new avenues for targeted drug design in the context of anti-viral or anti-cancer  
393 strategies.

394

#### 395 **Material and Methods**

396 **Antibodies and reagents.** Rabbit polyclonal anti-BST2 serum was previously described (Dube, 2010).  
397 Mouse monoclonal antibodies (mAb) anti-HA (HA.11 Clone 16B12), and anti-ILT7\_alexa647 were  
398 acquired from Biolegend. Rabbit anti-Myc Abs and Protein A-HRP were purchased from Sigma and  
399 Southern Biotech, respectively. All secondary Abs used for flow cytometry were purchased from Life  
400 Technologies. TLR7 agonists Gardiquimod (final concentration: 2.5 µg/ml) was obtained from InvivoGen.

401 **Cell lines and plasmids.** HEK-293T and HEK-blue human IFN reporter cell lines were obtained from  
402 ATCC and InvivoGen, respectively. These cells were maintained in DMEM supplemented with 10% FBS.  
403 The ILT7 NFAT-GFP (CT550) cells were described previously<sup>10</sup>. These cells were maintained in RPMI  
404 supplemented with 10% FBS. High Five insect cells were maintained at a cell density of  $0.5-1 \times 10^6$   
405 cells/mL in Express Five medium (Life Technologies) supplemented with 16mM L-glutamine. HEK-293T  
406 cells were transiently transfected using lipofectamine 2000 (Invitrogen). Usually, 0.5-1.5 µg of DNA was  
407 added to each well of a 24-well plate (wp) (125,000 cells/well) and media was replaced 18-24 h post  
408 transfection. Unless specified otherwise, un-tagged BST2 open reading frames were cloned into the  
409 pcDNA3.1 backbone for transient transfections. Tagged versions of BST2 WT ORF (with internal tags  
410 added after amino acid 154) plus cloning restriction enzymes sites were chemically synthesized  
411 (Invitrogen) and cloned in the pcDNA3.1 backbone. All mutations introduced in BST2 were generated by  
412 PCR-based mutagenesis using specific primers (Table S2). All mutations were validated by automated  
413 sequencing. BST2 alanine scanning mutants (cloned in pFLAG-tetherin, with N-terminal tag) were a kind  
414 gift from Dr. Paul Spearman<sup>32</sup>. Each mutant in the panel incorporates four alanine residues, starting from  
415 amino acid position 47 and continuing through to position 150.



416 **Surface antigen staining and flow cytometry analysis.** BST2 cell-surface staining and flow cytometry  
417 analysis was performed as previously described<sup>49</sup>. Briefly, HEK-293T cells were washed in PBS and  
418 stained with the specific primary antibody (anti-BST2 rabbit serum, anti-HA or anti-Myc) for 45 min at  
419 4°C. Cells were then washed and stained using appropriate Alexa Fluor-coupled secondary Abs for 30  
420 min at 4°C. After an additional wash, cells were analyzed for cell-surface BST2 expression by flow  
421 cytometry. Cells from co-cultures between transfected HEK-293T and ILT7+ NFAT-GFP reporter cells  
422 were collected, washed in PBS and stained with anti-ILT7\_alexa647 antibodies for 45 min at 4°C. Cells  
423 were then washed and analyzed for cell-surface ILT7 and GFP expression by flow cytometry.  
424 Fluorescence intensities were acquired using a Cyan ADP flow cytometer and data was analyzed using  
425 the FlowJo software (Treestar). In all histograms shown, mean fluorescence intensity (MFI) values are  
426 shown for each sample.

427 **Activation of ILT7 using ILT7<sup>+</sup> NFAT-GFP reporter cells.** Two days prior to co-culture, HEK-293T  
428 cells were transfected with empty pcDNA3.1, and plasmids encoding for BST2 WT or mutants. ILT7<sup>+</sup>  
429 NFAT-GFP reporter cells (100,000 cells/well) were added in a final volume of 500µl. The co-cultures  
430 were maintained for an additional 18-24 h, at which time samples were analyzed by flow cytometry for  
431 surface ILT7 and % of GFP expressing reporter cells from the ILT7<sup>+</sup> gate. Given that the extent of ILT7  
432 activation is directly proportional to surface levels of BST2 on co-cultured 293T targets cells<sup>30</sup>, expression  
433 of all BST2 mutants was standardized to match that of the internal BST2 WT control.

434 **Preparation of PBMCs and co-cultures.** Peripheral blood samples were obtained from healthy adult  
435 donors who gave written informed consent in accordance with the Declaration of Helsinki under research  
436 protocols approved by the research ethics review board of the IRCM. PBMCs were isolated by Ficoll-  
437 Paque centrifugation (GE Healthcare) and cultured in RPMI-1640 media supplemented with 10% FBS.  
438 Two days prior to co-culture, HEK-293T cells were transfected with empty pcDNA3.1 or plasmids  
439 encoding for BST2 WT or mutants. PBMCs at a ratio of 3:1 (PBMC:293T cell) were added in a final  
440 volume of 250µl. After 4 h of co-culture, TLR7 agonist Gardiquimod was added to a final concentration  
441 of 2.5 µg/ml and cells were kept in co-culture for an additional 18-24 h as previously described<sup>30</sup>. In all  
442 conditions, co-cultures were then transferred to a V-bottom 96-well plate and centrifuged for 5 min at  
443 400g. As a control, transfected HEK-293T cells were treated with TLR7 agonist in absence of PBMCs.



444 Supernatants were then used to quantify the amounts of bioactive IFN-I produced. Each experimental  
445 replicate (n) was performed using cells from a different donor.

446 **Quantification of IFN-I.** Detection of bioactive human IFN-I was performed using reporter cell line HEK-  
447 Blue IFN- $\alpha/\beta$  (InvivoGen) as previously described<sup>12</sup>. IFN-I concentration (U/ml) was extrapolated from  
448 the linear range of a standard curve generated using known amounts of IFN-I.

449 **Surface plasma resonance.** For Surface Plasmon Resonance (SPR) analysis, the synthetic codon-  
450 optimized ILT7 gene (Eurofins Genomics) encoding residues 24 to 435 (bacILT7 24-435) was cloned  
451 into the transfer vector pFL, followed by Tn7-based transposition into the EMBacY bacmid to generate  
452 a recombinant baculovirus<sup>50</sup>. The extended coiled-coil domain of BST2 (residues 80 to 147) was cloned  
453 into the pBADM30 expression vector in order to construct a His-tagged GST-fusion protein. The  
454 supernatant of SF21 insect cells secreting bacILT7 was collected 4 days post infection, dialyzed against  
455 buffer A (20 mM Tris, 150 mM NaCl, pH 7.2) and concentrated 2-fold. The supernatant was then applied  
456 to a nickel-affinity chromatography (Qiagen) column. The column was washed sequentially with buffer A  
457 containing 10, 50 and 70 mM imidazole, followed by elution of bacILT7 with buffer A containing 300 mM  
458 imidazole. The eluted fractions were pooled and dialyzed extensively against buffer B (20 mM Tris, 150  
459 mM NaCl, 10% glycerol). Analytical size exclusion chromatography showed that the majority of the  
460 protein eluted in a peak at 13 mL from a Superdex 200 column (GE Healthcare). BacILT7 was dialysed  
461 against HBS-PE and cleared by centrifugation at 100,000 g for 20 min. GST-BST2 (80-147) was  
462 expressed in E. coli Rosetta (DE3) cells (Novagen) and purified in buffer C (20 mM Tris, 100 mM NaCl,  
463 pH 7.5) by nickel-affinity chromatography (Qiagen) followed by size-exclusion chromatography on a  
464 Superdex 200 column in buffer D (20 mM HEPES, 100 mM NaCl, 10 mM EDTA, pH 7.5). SPR was  
465 performed on a Biacore 3000 (GE Healthcare) system using HBS-PE as a running buffer (10 mM HEPES  
466 pH 7.5, 150 mM NaCl, 3 mM EDTA and 0.005% Tween-20). GST-BST2 (80-147) was diluted to 5  $\mu$ g/ml  
467 in 10 mM sodium acetate (pH 4) buffer and covalently immobilized to the surface of a CM5 sensor chip  
468 by amine coupling according to the manufacturer's instructions, yielding an  $R_{\text{ligand}}$  of 6550 RU. A  
469 reference flow cell was generated by amine coupling of GST alone ( $R_{\text{ligand}}=1028$ ). BacILT7 was serially  
470 diluted into running buffer and passed over the chip at a flow rate of 10  $\mu$ l/min. The response from the  
471 GST-coated reference cell was subtracted from the response resulting from specific binding to the target  
472 protein. Regeneration of the sensor chip was achieved with 10 mM HCl for 60 seconds. The spikes

473 present in the sensorgrams are due to a delay in the bulk refractive index change between the flow cells,  
474 which is exacerbated by the 10  $\mu$ l/min flow rate. Data were analyzed with the BIAevaluation software  
475 version 4.1.

476 **BST2 dimerization assay.** A converging (or double) gradient of expression was generated by  
477 transfecting different ratios of plasmids encoding HA-BST2 WT and Myc BST2 136A mutants such that  
478 condition 1 and 11 represent only HA-BST2 WT or Myc-BST2 R136A, respectively, and condition 6 is  
479 the mid-point where each plasmid was transfected at equal ratios (50% of each). For each condition, 1.2  
480  $\mu$ g of total DNA was transfected. The ratio of each expression plasmid varied by 10% between each  
481 condition such that as the HA-BST2 WT-expressing plasmid was reduced, the Myc-BST2 R136A-  
482 expressing plasmid was increased. Forty-eight hours post transfection, a replica well was used for co-  
483 culture with ILT7<sup>+</sup> NFAT-GFP reporter cells to measure ILT7 activation as described above. In parallel,  
484 another replica well was used for surface BST2 staining using either anti-HA, anti-Myc or anti-BST2  
485 antibodies followed by flow cytometry analysis. Staining for total BST2 was used as an internal control  
486 to ensure that similar levels of total surface BST2 were achieved in for all transfection conditions

487 **Co-immunoprecipitation and Western blot.** HA-CAML- or HA-BST2 WT-expressing plasmids were  
488 cotransfected with Myc-tagged BST2 (WT or R136A mutant) expressors in HEK-293T. Cells were  
489 harvested and lysed in RIPA-DOC buffer (10 mM Tris pH 7.2, 140 mM NaCl, 8 mM Na<sub>2</sub>HPO<sub>4</sub>, 2 mM  
490 NaH<sub>2</sub>PO<sub>4</sub>, 1% Nonidet-P40, 0.5% sodium dodecyl sulfate, 1.2 mM deoxycholate) 48 h post-transfection.  
491 Ten percent of each lysates was preserved to control for protein expression (input). The remaining cell  
492 lysates were incubated with anti-HA for 2 h at 4°C, prior to precipitation with Protein A Sepharose beads  
493 (GE Healthcare). Immunoprecipitates were separated by 12.5% SDS-PAGE and analyzed for the  
494 presence HA-BST2 WT or Myc-BST2 (WT or R136A mutant) or the negative control HA-CAML by  
495 western blot using either anti-HA or anti-Myc Abs.

496 **Microscale thermophoresis.** ILT7 24-223 was expressed and purified as indicated above. ILT7 eluting  
497 in the central fraction from the gel filtration column corresponding to monomeric ILT7 was used for all  
498 microscale thermophoresis experiments at 1.1  $\mu$ M in a buffer containing 20 mM HEPES pH7,5, 150mM  
499 NaCl. The BST2 ectodomain (residues 47 to 159), WT or mutants, were cloned into expression vector  
500 pPROEX HTb (Invitrogen). BST2 protein expression was performed in E. coli Rosetta2 cells induced

501 with IPTG at 20°C overnight. Cells were lysed in buffer A (20mM Tris pH 8.0, 100mM NaCl, 10mM  
502 imidazole). Proteins were purified by nickel-affinity chromatography, and washed with buffer B (20mM  
503 Tris pH 8.0, 100mM NaCl) containing 20mM and 50mM imidazole for the first and second wash. Only  
504 one wash was performed for the BST2 L70D mutant purification. The bound protein fraction was eluted  
505 with buffer B containing 250mM imidazole. The His-tag was removed by TEV protease cleavage and  
506 both TEV and uncleaved protein were removed by nickel-affinity chromatography. Final purification steps  
507 included a size-exclusion chromatography (Superdex 75, GE Healthcare) in buffer C (20 mM HEPES  
508 pH 7,5, 150 mM NaCl). The supernatant of High Five insect cells secreting bacILT7 was collected 4 days  
509 post infection, dialyzed against buffer A (20 mM Tris, 150 mM NaCl, pH 7.2). The supernatant was then  
510 applied to a nickel-affinity chromatography (His Trap excel, GE Healthcare) equilibrated with buffer B  
511 (20mM Tris pH 7.2, 150mM NaCl) and washed with buffer B containing 30mM imidazole. The bound  
512 protein fraction was eluted with buffer B containing 500mM imidazole and 10% glycerol. Final purification  
513 step included a size exclusion chromatography (Superdex 200 increase column, GE Healthcare) in buffer  
514 C (20mM HEPES pH7,5, 150mM NaCl). ILT7 purified protein was labeled using the Protein Labeling Kit  
515 RED-NHS (NanoTemper Technologies). The labeling reaction was performed according to the  
516 manufacturer's instructions. The labeled ILT7 was adjusted to 1µM with a buffer containing 20mM  
517 HEPES pH 7,5, 150mM NaCl and supplemented with 0.05 % Tween 20. A series of 16 1:1 dilutions of  
518 BST2 WT or mutants was prepared using the same buffer. For the measurement, each ligand dilution  
519 was mixed with one volume of labeled ILT7, and the samples were loaded into Monolith NT.115  
520 Capillaries (NanoTemper Technologies). Instrument parameters were adjusted to 80% LED power and  
521 medium MST power (40%). Data of three independently pipetted measurements were analyzed  
522 (MO.Affinity Analysis software version 2.3, NanoTemper Technologies) using the signal from an MST-  
523 on time of 20s.

524 **Biophysical characterization of BST2 by circular dichroism (CD).** CD spectroscopy measurements  
525 were performed using a JASCO spectropolarimeter equipped with a thermoelectric temperature  
526 controller. Spectra of each sample were recorded at 20 °C in buffer A (50 mM phosphate pH 7.5). For  
527 thermal denaturation experiments, the ellipticity was recorded at 222 nm with 1 °C steps from 20 to 92 °C  
528 with a slope of 1°/min. Ellipticity values were converted to mean residue ellipticity.

529 **Crosslinking.** BST2 WT and mutants were crosslinked with 5mM EGS (ethylene glycol bis  
530 succinimidylsuccinate, Pierce) at 1mg/ml in a buffer containing 50 mM phosphate pH 7.5 for 15 min at  
531 room temperature. Crossed linked samples were separated on a 15% SDS-PAGE and stained with  
532 Coomassie Brilliant Blue.

533 **Statistical analysis.** Statistical analysis was performed using repeated measures ANOVA, with  
534 Bonferroni's multiple comparison test or two-tailed paired Student's t-tests. A p value of <0.05 was  
535 considered significant. The following symbols were used throughout the manuscript: \*\*\* p<0.001, \*\*  
536 p<0.01, \* p<0.05, ns not significant (p>0.05).

537

538 **Acknowledgements**

539 We thank E. Massicotte and J. Lord-Grignon for assistance with flow cytometry; the IRCM clinic staff,  
540 and all volunteers for providing blood samples. The plasmids encoding the BST2 ectodomain with the  
541 non-overlapping quadruple alanine mutations were a kind gift from Dr. Paul Spearman (University of  
542 Cincinnati). The ILT7 reporter cell lines were a generous gift from Dr. Y-J Liu.

543 This study was supported by Canadian Institutes of Health Research (CIHR) grants PJT148686 and  
544 FDN 154324 to ÉAC. ÉAC is recipient of the IRCM-UdeM Chair of Excellence in HIV research. WW  
545 acknowledges support from the ANRS (N° 073744), the Institute Universitaire de France (IUF) and the  
546 Grenoble Partnership for Structural Biology platforms (ISBG; UMS 3518 CNRS-CEA-UJF-EMBL) funded  
547 by FRISBI (ANR-10-INSB-05-02) and GRAL (ANR-10-LABX-49-01). NA was supported by a PhD  
548 fellowship from the Fond National de la Recherche Luxembourg. We further thank Caroline Mas (ISBG,  
549 Biophysical Platform Manager) and Pierre Soule (Application specialist, Nanotemper society) for their  
550 expert help with the analyses of the Microscale Thermophoresis experiments.

551

552 **Author Contributions**

553 MGB and EAC conceived the original idea with input from WW. MGB, AL, and AM designed and carried  
554 out the functional experiments while NM, NA designed and carried out the binding experiments and the  
555 biophysical studies with input from FG and WW. MGB and EAC wrote the manuscript with support from  
556 WW, NM, and AL. EAC supervised the project with input from WW.

557

558 **Competing Interests statement**

559 The authors declare no competing interests.

**Table S1: Natural variants of BST2**

| Single nucleotide polymorphisms                                                                                                                                                                                                                                                                            |                         |         |                         |                                             |             |              |            |
|------------------------------------------------------------------------------------------------------------------------------------------------------------------------------------------------------------------------------------------------------------------------------------------------------------|-------------------------|---------|-------------------------|---------------------------------------------|-------------|--------------|------------|
| dbSNP- refSNP Cluster Report                                                                                                                                                                                                                                                                               | ExAC browser variant    | Alleles | Mutation                | Minor allele frequency / Minor allele count |             |              |            |
|                                                                                                                                                                                                                                                                                                            |                         |         |                         | ExAC                                        | GO-ESP      | TOPMED       | 1000Genom. |
| rs141648094                                                                                                                                                                                                                                                                                                | 19:17516363 A / G       | A/G     | <b>Y8H</b>              | G=0.0006/70                                 | G=0.0003/4  | G=0.0004/49  |            |
| rs376557702                                                                                                                                                                                                                                                                                                | 19:17516329 C / T       | C/T     | <b>R19H</b>             | T=0.00004/5                                 | T=0.0002/2  | T=0.00004/5  |            |
| rs144978205                                                                                                                                                                                                                                                                                                | 19:17516239 T / C       | T/C     | <b>N49S</b>             | C=0.0002/24                                 | C=0.0005/6  | C=0.0004/45  |            |
| rs200950817                                                                                                                                                                                                                                                                                                | 19:17516225 G / A       | G/A     | <b>R54W</b>             | A=0.0002/21                                 |             | A=0.0002/31  | A=0.0006/3 |
| Not found in dbSNP                                                                                                                                                                                                                                                                                         | 19:17516191 T / C       | T/C     | <b>N65S</b>             | C=0.0002/29                                 |             |              |            |
| rs372280394                                                                                                                                                                                                                                                                                                | Not found in ExAC       | C/T     | <b>D103N*</b>           |                                             | T=0.00008/1 | T=0.000008/1 |            |
| rs377285248                                                                                                                                                                                                                                                                                                | Not found in ExAC       | T/G     | <b>E117A</b>            |                                             | G=0.00008/1 |              |            |
| rs189347354                                                                                                                                                                                                                                                                                                | 19:17514964 G / C       | G/C     | <b>D129E</b>            | C=0.0005/26                                 | C=0.0002/2  | C=0.0003/37  | C=0.0010/5 |
| rs201005145                                                                                                                                                                                                                                                                                                | 19:17514611 C / A       | C/A     | <b>V146L</b>            | A=0.0004/48                                 | A=0.0003/4  | A=0.0002/20  |            |
| *D103N also found as somatic mutation in prostate cancer, cBioportal patient #SC_9010                                                                                                                                                                                                                      |                         |         |                         |                                             |             |              |            |
| Somatic mutations                                                                                                                                                                                                                                                                                          |                         |         |                         |                                             |             |              |            |
| Cosmic mutation ID                                                                                                                                                                                                                                                                                         | cBioportal patient      | Alleles | Mutation                | Source (allele frequency, when applicable)  |             |              |            |
| COSM1611782                                                                                                                                                                                                                                                                                                | Not found in cBioportal | T/C     | <b>E62G</b>             | Liver carcinoma                             |             |              |            |
| COSM992791                                                                                                                                                                                                                                                                                                 | Not found in cBioportal | C/T     | <b>C63Y</b>             | Endometrium carcinoma                       |             |              |            |
| COSM5481489                                                                                                                                                                                                                                                                                                | Not found in cBioportal | G/T     | <b>Q87H</b>             | Colorectal cancer                           |             |              |            |
| COSM3822264                                                                                                                                                                                                                                                                                                | TCGA-A2-A0T5-01         | T/G     | <b>T90P<sup>†</sup></b> | Breast cancer (0.25)                        |             |              |            |
| COSM69854                                                                                                                                                                                                                                                                                                  | TCGA-09-2050-01         | T/G     | <b>Q110H</b>            | Ovary carcinoma (0.12)                      |             |              |            |
| COSM4402117                                                                                                                                                                                                                                                                                                | TCGA-D9-A6EC-06         | G/A     | <b>E119K</b>            | Skin cutaneous melanoma (0.43)              |             |              |            |
| COSM349518                                                                                                                                                                                                                                                                                                 | LUAD-YINH D             | G/T     | <b>S145R</b>            | Lung adenocarcinoma (0.11)                  |             |              |            |
| COSM349518                                                                                                                                                                                                                                                                                                 | TCGA-51-6867-01         | G/T     | <b>S145R</b>            | Lung squamous cell carcinoma (0.27)         |             |              |            |
| <sup>†</sup> T90P was also proposed as a potential rare SNP<br>Note: allele frequency of somatic mutations in an individual measures proportions of cells where the mutation reside in; could reflect both selective growth advantage and chronological sequence of the mutation (Reported by cBioportal). |                         |         |                         |                                             |             |              |            |

560

**Table S2 – Oligonucleotides used in this study**

| Reference       | Oligo Name                | Sequence (5' to 3')                   |
|-----------------|---------------------------|---------------------------------------|
| <b>Figure 3</b> | BST2-H93A_F               | CCACCTGCAACGCCACTGTGATGGC             |
|                 | BST2-H93A_R               | GCCATCACAGTGGCGTTGCAGGTGG             |
|                 | BST2-M96A_F               | TGCAACCACACTGTGGCCGCCCTAATGGCTTCC     |
|                 | BST2-M96A_R               | GGAAGCCATTAGGGCGGCCACAGTGTGGTTGCA     |
|                 | BST2-D103A_F              | CTAATGGCTTCCCTGGCTGCAGAGAAGGCCCAA     |
|                 | BST2-D103A_R              | TTGGGCCTTCTCTGCAGCCAGGAAGCCATTAG      |
|                 | BST2-E115A_F              | GAAAGTGGAGGCCCTTGAGGGAGAGA            |
|                 | BST2-E115A_R              | TCTCTCCCTCAAGGGCCTCCACTTTC            |
|                 | BST2-G118A_F              | GGAGCTTGAGGCCGAGATCACTAC              |
|                 | BST2-G118A_R              | GTAGTGATCTCGGCCTCAAGCTCC              |
|                 | BST2-T121A_F              | GAGGGAGAGATCGCTACATTAACCAT            |
|                 | BST2-T121A_R              | ATGGTTTAATGTAGCGATCTCTCCCTC           |
|                 | BST2-T122A_F              | GAGAGTCACTGCCTTAAACCATAAG             |
|                 | BST2-T122A_R              | CTTATGGTTTAAGGCAGTGATCTCTC            |
|                 | BST2-TT121-122AA_F        | TTGAGGGAGAGATCGCTGCCTTAAACCATAAGCTTCA |
|                 | BST2-TT121-122AA_R        | TGAAGCTTATGGTTTAAGGCAGCGATCTCTCCCTCAA |
|                 | BST2-H125A_F              | ACTACATTAACGCCAAGCTTCAGGAC            |
|                 | BST2-H125A_R              | GTCCTGAAGCTTGGCGTTAATGTAGT            |
|                 | BST2-Q128A_F              | CCATAAGCTTGCCGACGCGTCTG               |
|                 | BST2-Q128A_R              | CAGACGCGTCGGCAAGCTTATGG               |
|                 | BST2-D129A_F              | TAAGCTTCAGGCCGCGTCTGCAGAG             |
|                 | BST2-D129A_R              | CTCTGCAGACGCGGCCTGAAGCTTA             |
|                 | BST2-QD128-129AA_F        | AACCATAAGCTTGCCGCGCGTCTGCAGAG         |
|                 | BST2-QD128-129AA_R        | CTCTGCAGACGCGGCGCAAGCTTATGGTT         |
|                 | BST2-E135A_F              | TCTGCAGAGGTGGCCCGACTGAGAAGAGAA        |
|                 | BST2-E135A_R              | TTCTCTTCTCAGTGGGCCACCTCTGCAGA         |
|                 | BST2-R136A_F              | TCTGCAGAGGTGGAGGCCCTGAGAAGAGAA        |
|                 | BST2-R136A_R              | TTCTCTTCTCAGGGCCTCCACCTCTGCAGA        |
|                 | BST2-ER135-6AA_F          | TCTGCAGAGGTGGCCGCCCTGAGAAGAGAA        |
|                 | BST2-ER135-6AA_R          | TTCTCTTCTCAGGGCGGCCACCTCTGCAGA        |
|                 | BST2-R139A_F              | GAGCGACTGAGAGCCGAAAACCAGGTC           |
|                 | BST2-R139A_R              | GACCTGGTTTTTCGGCTCTCAGTCGCTC          |
| BST2-Q142A_F    | AAGAGAAAACGCCGTCTTAAGCGTG |                                       |
| BST2-Q142A_R    | CACGCTTAAGACGGCGTTTTCTCTT |                                       |
| <b>Figure 5</b> | BST2-C53A_F               | AGGCCGCCCGGGACGGCCTT                  |
|                 | BST2-C53A_R               | TCCCGGGCGGCCCTCGCTGTT                 |
|                 | BST2-C63A_F               | GTGATGGAGGCCCGCAATGTC                 |
|                 | BST2-C63A_R               | GACATTGCGGGCCTCCATCAC                 |
|                 | BST2-C91A_F               | GCCGCCACCGCCAACCACACT                 |
|                 | BST2-C91A_R               | AGTGTGGTTGGCGGTGGCGGC                 |
|                 | BST2-N65Q_F               | GAGTGTCCAGGTCACCCAT                   |
|                 | BST2-N65Q_R               | ATGGGTGACCTGGCGACTC                   |
|                 | BST2-N92Q_F               | GCCACCTGCCAGCACACTGTG                 |
|                 | BST2-N92Q_R               | CACAGTGTGCTGGCAGGTGGC                 |
|                 | BST2-C91A/N92A_F          | GGCCGCCACCGCCAGCACACTGTGATGGC         |
|                 | BST2-C91A/N92A_R          | GCCATCACAGTGTGCTGGGCGGTGGCGGCC        |
| <b>Figure 6</b> | BST2-L70D_F               | CACCCATCTCGATCAACAAGAGCTGAC           |
|                 | BST2-L70D_R               | GTCAGCTCTTGTGATCGAGATGGGTG            |
|                 | BST2-L127C_F              | TTAAACCATAAGTGTGAGGACGCGTCT           |
|                 | BST2-L127C_R              | AGACGCGTCTGACACTTATGGTTAA             |
|                 | BST2-V134C_F              | GCGTCTGCAGAGTGCAGCGACTGAGA            |
|                 | BST2-V134C_R              | TCTCAGTCGCTCGCACTCTGCAGACGC           |

| <b>Table S2 – Oligonucleotides used in this study (continuation)</b> |                          |                                   |
|----------------------------------------------------------------------|--------------------------|-----------------------------------|
| <b>Reference</b>                                                     | <b>Oligo Name</b>        | <b>Sequence (5' to 3')</b>        |
| <b>Figure 7</b>                                                      | <b>SNP</b>               |                                   |
|                                                                      | BST2-Y8H_F               | TCGTATGACCATTGCAGAGTG             |
|                                                                      | BST2-Y8H_R               | CACTCTGCAATGGTCATACGA             |
|                                                                      | BST2-R19H_F              | GGGGATAAGCACTGTAAGCTT             |
|                                                                      | BST2-R19H_R              | AAGCTTACAGTGCTTATCCCC             |
|                                                                      | BST2-N49S_F              | ATCAAGGCCAGCAGCGAGGCC             |
|                                                                      | BST2-N49S_R              | GGCCTCGCTGCTGGCCTTGAT             |
|                                                                      | BST2-R54W_F              | AACAGCGAGGCCTGCTGGGACGGCCTTCGGGCA |
|                                                                      | BST2-R54W_R              | TGCCCCAAGGCCGTCCCAGCAGGCCTCGCTGTT |
|                                                                      | BST2-N65S_F              | ATGGAGTGTGCGAGTGTACCCATCTCCTG     |
|                                                                      | BST2-N65S_R              | CAGGAGATGGGTGACACTGCGACACTCCAT    |
|                                                                      | BST2-D103N_F             | GCTTCCCTGAATGCAGAGAAG             |
|                                                                      | BST2-D103N_R             | CTTCTCTGCATTCAAGGAAGC             |
|                                                                      | BST2-E117A_F             | GAGGAGCTTGCGGGAGAGATC             |
|                                                                      | BST2-E117A_R             | GATCTCTCCCGCAAGCTCCTC             |
|                                                                      | BST2-D129E_F             | AAGCTTCAGGAGGCGTCTGCA             |
|                                                                      | BST2-D129E_R             | TGCAGACGCCTCCTGAAGCTT             |
|                                                                      | BST2-V146L_F             | GTCTTAAGCTTGAGAATCGCG             |
|                                                                      | BST2-V146L_R             | CGCGATTCTCAAGCTTAAGAC             |
|                                                                      | <b>Somatic mutations</b> |                                   |
|                                                                      | BST2-E62G_F              | CGGGCAGTGATGGGGTGTGCAATGTC        |
|                                                                      | BST2-E62G_R              | GACATTGCGACACCCCATCACTGCCCG       |
|                                                                      | BST2-C63Y_F              | GCAAGTATGGAGTATCGCAATGTCACCCA     |
|                                                                      | BST2-C63Y_R              | TGGGTGACATTGCGATACTCCATCACTGC     |
|                                                                      | BST2-Q87H_F              | GGAGGCCCATGCCGCCACCTGC            |
|                                                                      | BST2-Q87H_R              | GCAGGTGGCGGCATGGGCCTCC            |
|                                                                      | BST2-T90P_F              | GCCCAGGCCGCCCTGCAACCACACT         |
|                                                                      | BST2-T90P_R              | AGTGTGGTTGCAGGGGGCGGCCTGGGC       |
|                                                                      | BST2-Q110H_F             | AAGGCCCAAGGACACAAGAAAGTGGAG       |
|                                                                      | BST2-Q110H_R             | CTCCACTTTCTTGTGTCCTTGGGCCTT       |
|                                                                      | BST2-E119K_F             | GAGCTTGAGGGAAAGACTACATTAAC        |
|                                                                      | BST2-E119K_R             | GTTTAATGTAGTCTTCCCTCAAGCTC        |
|                                                                      | BST2-S145R_F             | AACCAGGTCTTAAGAGTGAGAATCGCG       |
|                                                                      | BST2-S145R_R             | CGCGATTCTCACTCTTAAGACCTGGTT       |

561

562



563 **References**

- 564 1 Swiecki, M. & Colonna, M. The multifaceted biology of plasmacytoid dendritic cells. *Nature reviews. Immunology* **15**, 471-485, doi:10.1038/nri3865 (2015).  
565
- 566 2 Essers, M. A. *et al.* IFNalpha activates dormant haematopoietic stem cells in vivo. *Nature* **458**,  
567 904-908, doi:10.1038/nature07815 (2009).
- 568 3 Hwang, S. Y. *et al.* A null mutation in the gene encoding a type I interferon receptor component  
569 eliminates antiproliferative and antiviral responses to interferons alpha and beta and alters  
570 macrophage responses. *Proceedings of the National Academy of Sciences of the United States*  
571 *of America* **92**, 11284-11288 (1995).
- 572 4 Swann, J. B. *et al.* Type I IFN contributes to NK cell homeostasis, activation, and antitumor  
573 function. *Journal of immunology* **178**, 7540-7549 (2007).
- 574 5 Zitvogel, L., Galluzzi, L., Kepp, O., Smyth, M. J. & Kroemer, G. Type I interferons in anticancer  
575 immunity. *Nature reviews. Immunology* **15**, 405-414, doi:10.1038/nri3845 (2015).
- 576 6 Chen, K., Liu, J. & Cao, X. Regulation of type I interferon signaling in immunity and inflammation:  
577 A comprehensive review. *Journal of autoimmunity* **83**, 1-11, doi:10.1016/j.jaut.2017.03.008  
578 (2017).
- 579 7 Picard, C. & Belot, A. Does type-I interferon drive systemic autoimmunity? *Autoimmunity reviews*  
580 **16**, 897-902, doi:10.1016/j.autrev.2017.07.001 (2017).
- 581 8 Snell, L. M., McGaha, T. L. & Brooks, D. G. Type I Interferon in Chronic Virus Infection and  
582 Cancer. *Trends in immunology* **38**, 542-557, doi:10.1016/j.it.2017.05.005 (2017).
- 583 9 Dzionek, A. *et al.* BDCA-2, a novel plasmacytoid dendritic cell-specific type II C-type lectin,  
584 mediates antigen capture and is a potent inhibitor of interferon alpha/beta induction. *The Journal*  
585 *of experimental medicine* **194**, 1823-1834 (2001).
- 586 10 Cao, W. *et al.* Plasmacytoid dendritic cell-specific receptor ILT7-Fc epsilonRI gamma inhibits  
587 Toll-like receptor-induced interferon production. *The Journal of experimental medicine* **203**,  
588 1399-1405, doi:10.1084/jem.20052454 (2006).
- 589 11 Cao, W. *et al.* Regulation of TLR7/9 responses in plasmacytoid dendritic cells by BST2 and ILT7  
590 receptor interaction. *The Journal of experimental medicine* **206**, 1603-1614,  
591 doi:10.1084/jem.20090547 (2009).
- 592 12 Bego, M. G., Mercier, J. & Cohen, E. A. Virus-activated interferon regulatory factor 7 upregulates  
593 expression of the interferon-regulated BST2 gene independently of interferon signaling. *Journal*  
594 *of virology* **86**, 3513-3527, doi:10.1128/JVI.06971-11 (2012).
- 595 13 Epeldegui, M., Blom, B. & Uittenbogaart, C. H. BST2/Tetherin is constitutively expressed on  
596 human thymocytes with the phenotype and function of Treg cells. *European journal of*  
597 *immunology* **45**, 728-737, doi:10.1002/eji.201444787 (2015).
- 598 14 Cao, W. & Bover, L. Signaling and ligand interaction of ILT7: receptor-mediated regulatory  
599 mechanisms for plasmacytoid dendritic cells. *Immunological reviews* **234**, 163-176,  
600 doi:10.1111/j.0105-2896.2009.00867.x (2010).
- 601 15 Mahauad-Fernandez, W. D. & Okeoma, C. M. The role of BST-2/Tetherin in host protection and  
602 disease manifestation. *Immunity, inflammation and disease* **4**, 4-23, doi:10.1002/iid3.92 (2016).

- 603 16 Kupzig, S. *et al.* Bst-2/HM1.24 is a raft-associated apical membrane protein with an unusual  
604 topology. *Traffic* **4**, 694-709 (2003).
- 605 17 Galao, R. P., Le Tortorec, A., Pickering, S., Kueck, T. & Neil, S. J. Innate sensing of HIV-1  
606 assembly by Tetherin induces NFkappaB-dependent proinflammatory responses. *Cell host &*  
607 *microbe* **12**, 633-644, doi:10.1016/j.chom.2012.10.007 (2012).
- 608 18 Rollason, R., Korolchuk, V., Hamilton, C., Schu, P. & Banting, G. Clathrin-mediated endocytosis  
609 of a lipid-raft-associated protein is mediated through a dual tyrosine motif. *Journal of cell science*  
610 **120**, 3850-3858, doi:10.1242/jcs.003343 (2007).
- 611 19 Ishikawa, J. *et al.* Molecular cloning and chromosomal mapping of a bone marrow stromal cell  
612 surface gene, BST2, that may be involved in pre-B-cell growth. *Genomics* **26**, 527-534 (1995).
- 613 20 Ohtomo, T. *et al.* Molecular cloning and characterization of a surface antigen preferentially  
614 overexpressed on multiple myeloma cells. *Biochemical and biophysical research*  
615 *communications* **258**, 583-591, doi:10.1006/bbrc.1999.0683 (1999).
- 616 21 Andrew, A. J., Miyagi, E., Kao, S. & Strebel, K. The formation of cysteine-linked dimers of BST-  
617 2/tetherin is important for inhibition of HIV-1 virus release but not for sensitivity to Vpu.  
618 *Retrovirology* **6**, 80, doi:10.1186/1742-4690-6-80 (2009).
- 619 22 Perez-Caballero, D. *et al.* Tetherin inhibits HIV-1 release by directly tethering virions to cells.  
620 *Cell* **139**, 499-511, doi:10.1016/j.cell.2009.08.039 (2009).
- 621 23 Weissenhorn, W. *et al.* Structural basis of tetherin function. *Current HIV research* **10**, 298-306  
622 (2012).
- 623 24 Schubert, H. L. *et al.* Structural and functional studies on the extracellular domain of  
624 BST2/tetherin in reduced and oxidized conformations. *Proceedings of the National Academy of*  
625 *Sciences of the United States of America* **107**, 17951-17956, doi:10.1073/pnas.1008206107  
626 (2010).
- 627 25 Yang, H. *et al.* Structural insight into the mechanisms of enveloped virus tethering by tetherin.  
628 *Proceedings of the National Academy of Sciences of the United States of America* **107**, 18428-  
629 18432, doi:10.1073/pnas.1011485107 (2010).
- 630 26 Hinz, A. *et al.* Structural basis of HIV-1 tethering to membranes by the BST-2/tetherin  
631 ectodomain. *Cell host & microbe* **7**, 314-323, doi:10.1016/j.chom.2010.03.005 (2010).
- 632 27 Swiecki, M. *et al.* Structural and biophysical analysis of BST-2/tetherin ectodomains reveals an  
633 evolutionary conserved design to inhibit virus release. *The Journal of biological chemistry* **286**,  
634 2987-2997, doi:10.1074/jbc.M110.190538 (2011).
- 635 28 Neil, S. J., Zang, T. & Bieniasz, P. D. Tetherin inhibits retrovirus release and is antagonized by  
636 HIV-1 Vpu. *Nature* **451**, 425-430, doi:10.1038/nature06553 (2008).
- 637 29 Van Damme, N. *et al.* The interferon-induced protein BST-2 restricts HIV-1 release and is  
638 downregulated from the cell surface by the viral Vpu protein. *Cell host & microbe* **3**, 245-252,  
639 doi:10.1016/j.chom.2008.03.001 (2008).
- 640 30 Bego, M. G. *et al.* Vpu Exploits the Cross-Talk between BST2 and the ILT7 Receptor to Suppress  
641 Anti-HIV-1 Responses by Plasmacytoid Dendritic Cells. *PLoS pathogens* **11**, e1005024,  
642 doi:10.1371/journal.ppat.1005024 (2015).

- 643 31 Bego, M. G., Cong, L., Mack, K., Kirchhoff, F. & Cohen, E. A. Differential Control of BST2  
644 Restriction and Plasmacytoid Dendritic Cell Antiviral Response by Antagonists Encoded by HIV-  
645 1 Group M and O Strains. *Journal of virology* **90**, 10236-10246, doi:10.1128/JVI.01131-16 (2016).
- 646 32 Hammonds, J. *et al.* The tetherin/BST-2 coiled-coil ectodomain mediates plasma membrane  
647 microdomain localization and restriction of particle release. *Journal of virology* **86**, 2259-2272,  
648 doi:10.1128/JVI.05906-11 (2012).
- 649 33 Andrew, A. J., Berndsen, C. E., Kao, S. & Strebel, K. The size and conservation of a coiled-coil  
650 structure in the ectodomain of human BST-2/tetherin is dispensable for inhibition of HIV-1 virion  
651 release. *The Journal of biological chemistry* **287**, 44278-44288, doi:10.1074/jbc.M112.418822  
652 (2012).
- 653 34 Lepelley, A. *et al.* Innate sensing of HIV-infected cells. *PLoS pathogens* **7**, e1001284,  
654 doi:10.1371/journal.ppat.1001284 (2011).
- 655 35 Crick, F. H. C. The packing of  $\alpha$ -helices: simple coiled-coils. *Acta Crystallographica* **6**, 689-697  
656 (1953).
- 657 36 McLachlan, A. D. & Stewart, M. Tropomyosin coiled-coil interactions: evidence for an  
658 unstaggered structure. *Journal of molecular biology* **98**, 293-304 (1975).
- 659 37 Kuster, H., Zhang, L., Brini, A. T., MacGlashan, D. W. & Kinet, J. P. The gene and cDNA for the  
660 human high affinity immunoglobulin E receptor beta chain and expression of the complete  
661 human receptor. *The Journal of biological chemistry* **267**, 12782-12787 (1992).
- 662 38 Tsukamoto, N. *et al.* Impairment of plasmacytoid dendritic cells for IFN production by the ligand  
663 for immunoglobulin-like transcript 7 expressed on human cancer cells. *Clinical cancer research :  
664 an official journal of the American Association for Cancer Research* **15**, 5733-5743,  
665 doi:10.1158/1078-0432.CCR-09-0171 (2009).
- 666 39 Willcox, B. E., Thomas, L. M. & Bjorkman, P. J. Crystal structure of HLA-A2 bound to LIR-1, a  
667 host and viral major histocompatibility complex receptor. *Nature immunology* **4**, 913-919,  
668 doi:10.1038/ni961 (2003).
- 669 40 Hammonds, J., Wang, J. J., Yi, H. & Spearman, P. Immunoelectron microscopic evidence for  
670 Tetherin/BST2 as the physical bridge between HIV-1 virions and the plasma membrane. *PLoS  
671 pathogens* **6**, e1000749, doi:10.1371/journal.ppat.1000749 (2010).
- 672 41 Habermann, A. *et al.* CD317/tetherin is enriched in the HIV-1 envelope and downregulated from  
673 the plasma membrane upon virus infection. *Journal of virology* **84**, 4646-4658,  
674 doi:10.1128/JVI.02421-09 (2010).
- 675 42 Fitzpatrick, K. *et al.* Direct restriction of virus release and incorporation of the interferon-induced  
676 protein BST-2 into HIV-1 particles. *PLoS pathogens* **6**, e1000701,  
677 doi:10.1371/journal.ppat.1000701 (2010).
- 678 43 Swiecki, M., Wang, Y., Gilfillan, S., Lenschow, D. J. & Colonna, M. Cutting edge: paradoxical  
679 roles of BST2/tetherin in promoting type I IFN response and viral infection. *Journal of  
680 immunology* **188**, 2488-2492, doi:10.4049/jimmunol.1103145 (2012).
- 681 44 Sauter, D. *et al.* A rare missense variant abrogates the signaling activity of tetherin/BST-2  
682 without affecting its effect on virus release. *Retrovirology* **10**, 85, doi:10.1186/1742-4690-10-85  
683 (2013).

- 684 45 Mahauad-Fernandez, W. D., DeMali, K. A., Olivier, A. K. & Okeoma, C. M. Bone marrow stromal  
685 antigen 2 expressed in cancer cells promotes mammary tumor growth and metastasis. *Breast*  
686 *cancer research : BCR* **16**, 493, doi:10.1186/s13058-014-0493-8 (2014).
- 687 46 Mukai, S. *et al.* Overexpression of Transmembrane Protein BST2 is Associated with Poor  
688 Survival of Patients with Esophageal, Gastric, or Colorectal Cancer. *Annals of surgical oncology*  
689 **24**, 594-602, doi:10.1245/s10434-016-5100-z (2017).
- 690 47 Gong, S., Osei, E. S., Kaplan, D., Chen, Y. H. & Meyerson, H. CD317 is over-expressed in B-  
691 cell chronic lymphocytic leukemia, but not B-cell acute lymphoblastic leukemia. *International*  
692 *journal of clinical and experimental pathology* **8**, 1613-1621 (2015).
- 693 48 Di Franco, S., Turdo, A., Todaro, M. & Stassi, G. Role of Type I and II Interferons in Colorectal  
694 Cancer and Melanoma. *Frontiers in immunology* **8**, 878, doi:10.3389/fimmu.2017.00878 (2017).
- 695 49 Dube, M. *et al.* Antagonism of tetherin restriction of HIV-1 release by Vpu involves binding and  
696 sequestration of the restriction factor in a perinuclear compartment. *PLoS pathogens* **6**,  
697 e1000856, doi:10.1371/journal.ppat.1000856 (2010).
- 698 50 Trowitzsch, S., Bieniossek, C., Nie, Y., Garzoni, F. & Berger, I. New baculovirus expression tools  
699 for recombinant protein complex production. *Journal of structural biology* **172**, 45-54,  
700 doi:10.1016/j.jsb.2010.02.010 (2010).

701

**a**

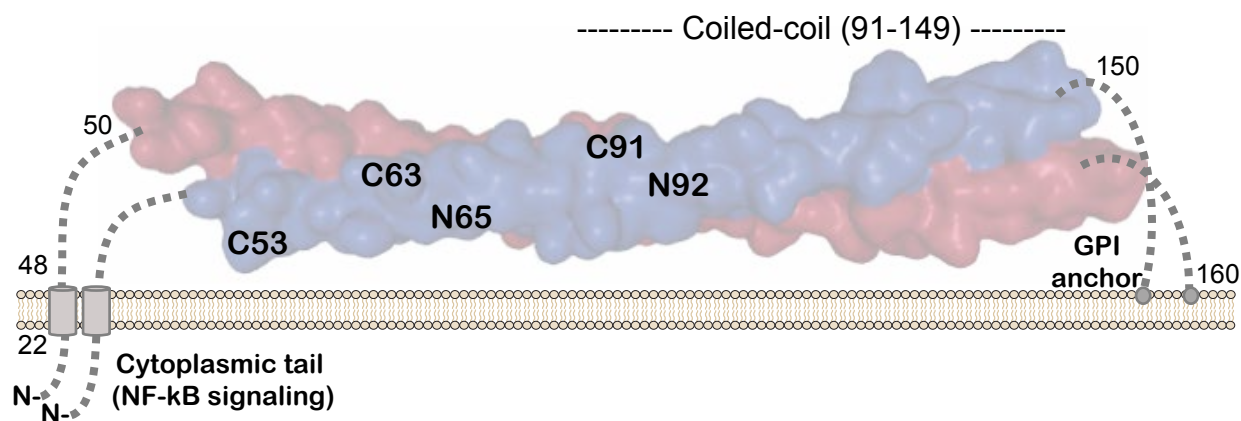

**b**

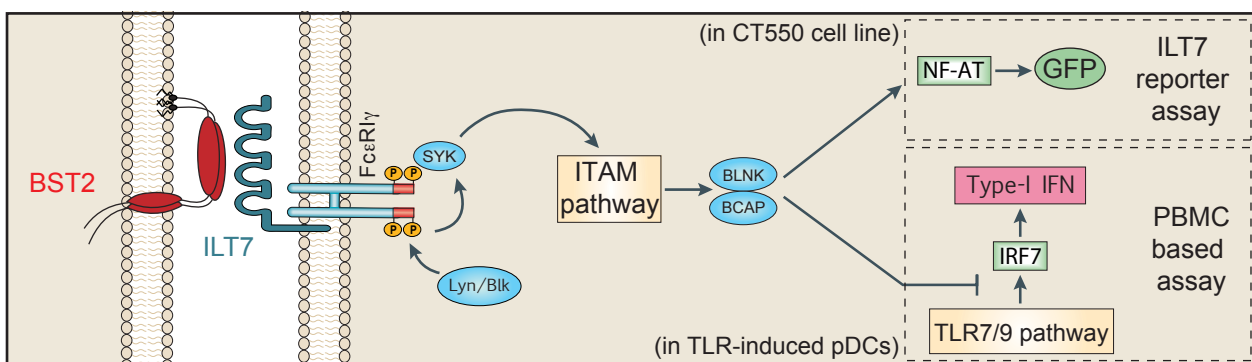

**c**

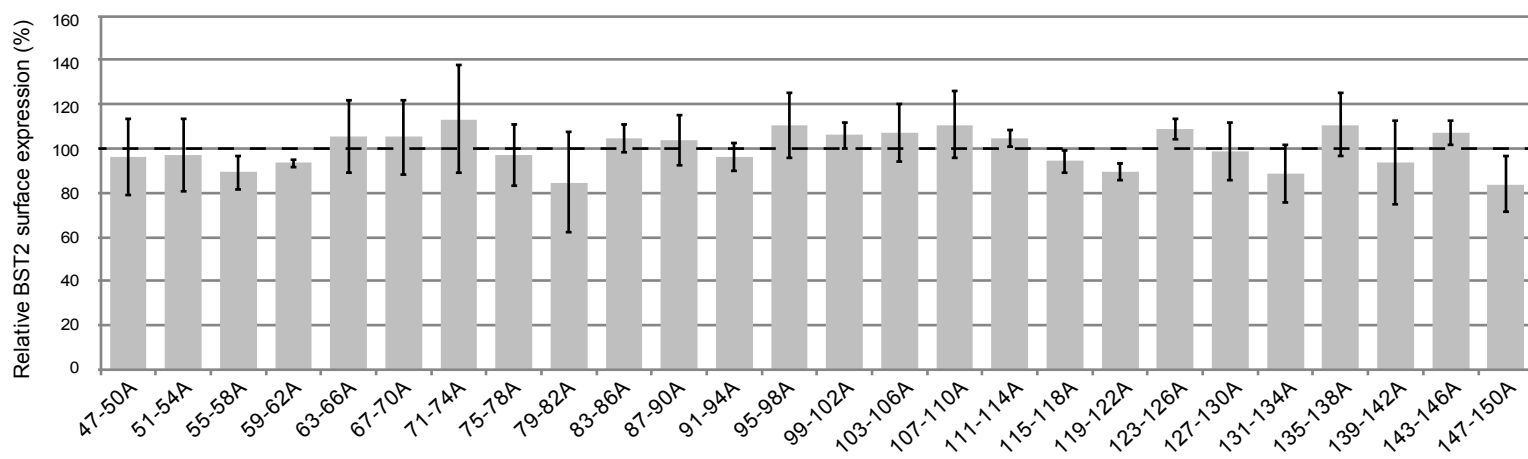

**d**

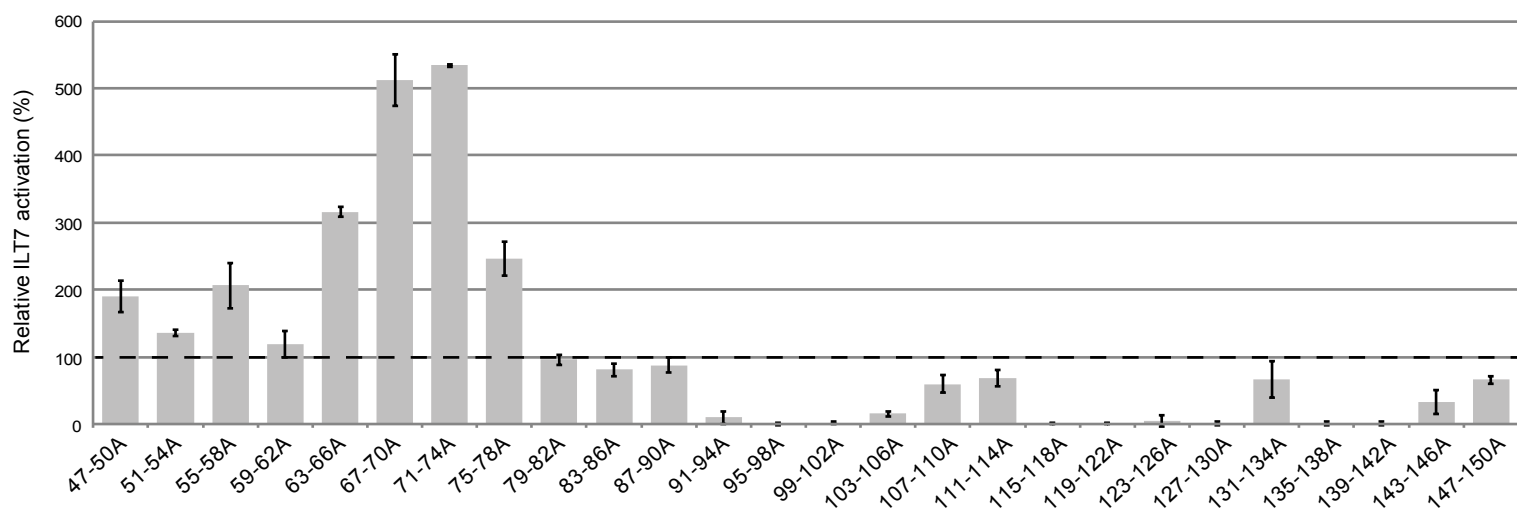

**Fig 1- Uncovering BST2 regions relevant for ILT7 activation using an alanine scan analysis of its ectodomain. a,** Schematic representation of BST2, a type II transmembrane (TM) protein of 160 amino acids, overlaying the crystal structure of BST2 ectodomain (PDB ID: 2XG7) published by Schubert et al<sup>24</sup> generated using NGL viewer<sup>51</sup>. BST2 features a short cytoplasmic N-terminus containing di-phosphotyrosines required for NF- $\kappa$ B signaling followed by an  $\alpha$ -helical single-pass TM domain and an ectodomain comprising an extended coiled-coil linked back to the plasma membrane by a C-terminal GPI anchor. N-glycosylation sites (N65 and N92) as well as cysteine residues used for disulfide-bond formation (C53, C63 and C91) in the extracellular domain are indicated. **b,** Schematic representation of BST2-ILT7 activation pathways and of the two assays used to measure BST2-mediated ILT7 activation. For the ILT7 reporter assay, BST2-expressing HEK-293T cells are co-cultured with ILT7+ NFAT-GFP reporter cells for 18-24 h and activation of the ITAM pathways is measured as the percentage of GFP+ reporter cells by flow cytometry. For the PBMC-based assay, BST2-expressing HEK-293T cells are co-cultured with PBMCs. After 4 h of co-culture, samples are either untreated or treated with Gardiquimod (TLR7 agonist) and levels of bioactive IFN-I released in supernatants measured 18-24 h later, as described in the Methods section. **c-d,** Alanine scan of BST2 ectodomain (non-overlapping groups of 4 residues mutated to alanines from positions 47 to 150). **c,** Relative BST2 surface expression in HEK-293T cells transfected with empty plasmid, plasmid encoding for BST2 WT or alanine mutants (n=6). Percentages of mean fluorescence intensities (MFIs) were calculated relative to BST2 WT-expressing cells (100%). **d,** ILT7+ NFAT-GFP reporter cells were co-cultured with control (empty) or HEK-293T cells expressing the above-mentioned BST2 (WT or mutants) and analyzed by flow cytometry (n=6). Percentage of ILT7 activation was plotted as % of GFP+ cells in each condition relative to the BST2 WT condition (100%) after subtracting the % of GFP+ cells in the no BST2 condition (0%). Error bars represent standard deviation (SD).



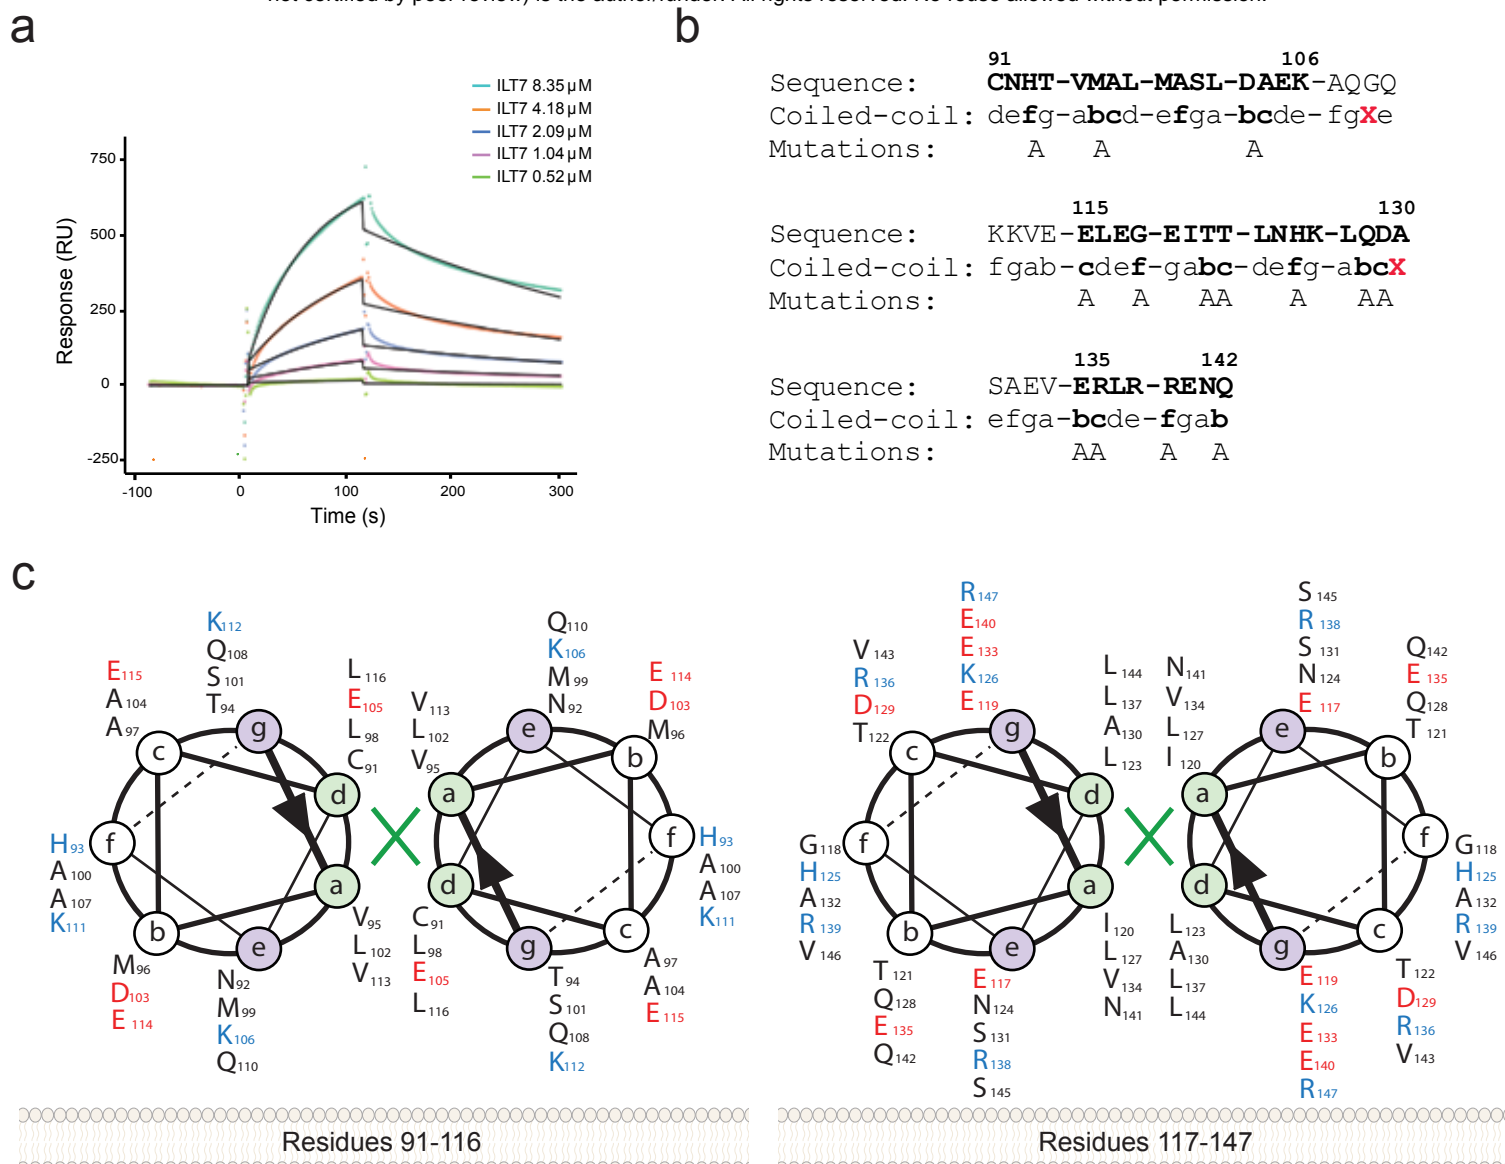

**Fig 2- Binding of ILT7 to BST2 coiled-coil region.** **a**, Recombinant GST-BST2 (80-147) pre-coated on the surface of Biacore sensor chip, was mixed with the indicated concentrations of bacILT7 24-435. The kinetic response data after subtracting the value from a reference cell coated with GST alone are shown. Kinetic constants ( $K_D=2.62 \mu\text{M}$ ,  $k_{on}=0.908 \times 10^3 \text{ M}^{-1}\text{s}^{-1}$ ,  $k_{off}=2.38 \times 10^{-3} \text{ s}^{-1}$ ) were derived by fitting the data (dotted lines) to a 1:1 Langmuir model (black lines) using local  $R_{max}$  parameters ( $\chi^2_2=4.95$ ). **b**, Identification of potentially individual exposed residues within BST2 coiled-coil region. Sequence of BST2 coiled-coil region, position of alanine scan mutants that failed to activate ILT7 (in bold), coiled-coil heptad positions (denoted a-g), positions most likely to be exposed (in bold; stutter position in red) as well as individual alanine substitutions of predicted BST2 exposed residues are indicated. **c**, Helical wheel diagram of the homodimeric parallel coiled-coil of BST2 (residues depicted from position 91- 116 and 117-147). The primary structure of each helix is characterized by a periodicity of seven residues or heptad repeat pattern. Heptad positions a and d (shaded green) are typically hydrophobic core residues present at the interface of the two helices, while e and g positions (shaded purple) typically form inter-helical ionic interactions and are all involved in the dimer formation. Residues often found in the remaining heptad repeat positions b, c, and f are exposed for potential interaction with binding partners. Charged amino acids are colored (negative in red and positive in blue). Given the BST2 unique double membrane anchored conformation, its fixed membrane facing interphase is highlighted as well.

a

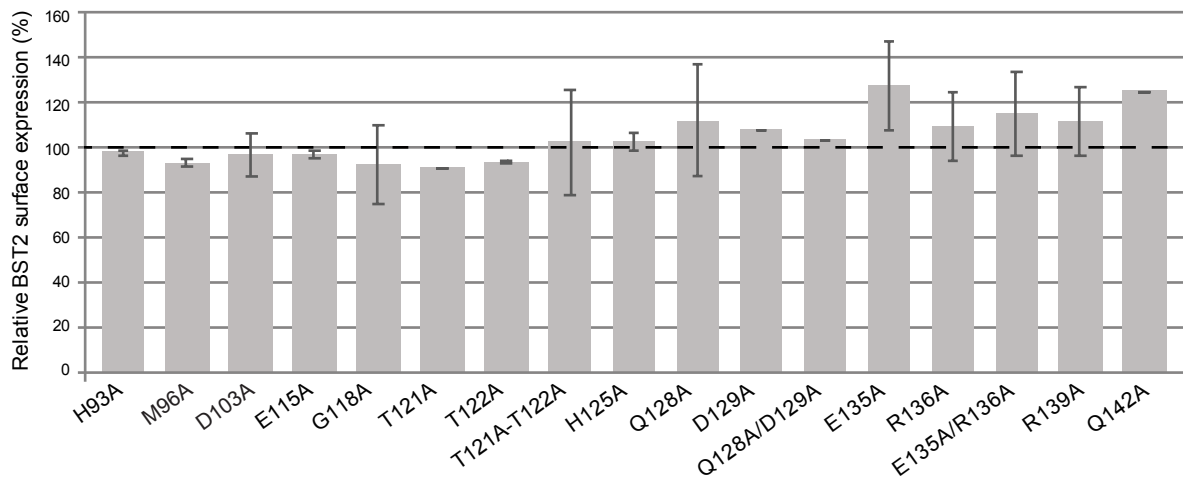

b

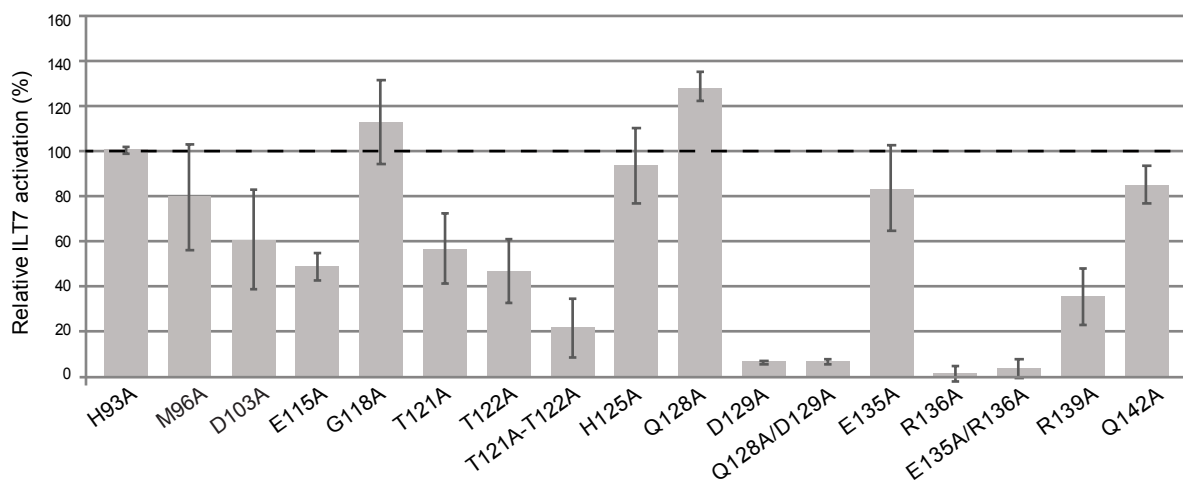

c

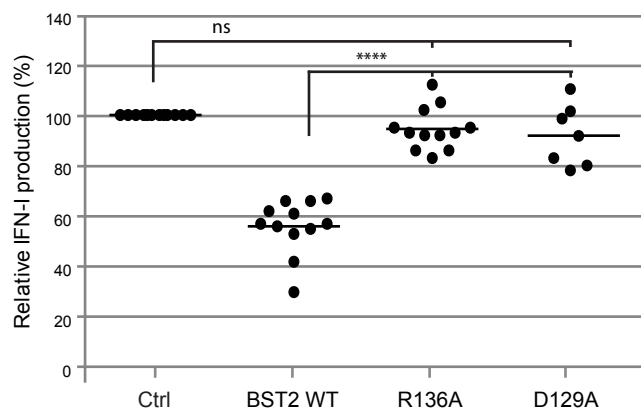

d

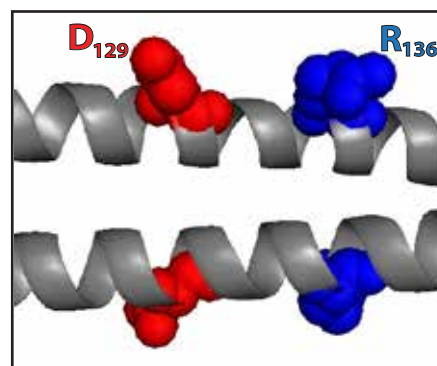

**Fig 3- Effect of alanine substitutions of predicted exposed BST2 residues on ILT7 activation.** **a**, Relative BST2 surface expression in HEK-293T cells transfected with control plasmids or plasmids encoding the indicated BST2 mutants (n=6). Percentages of MFIs were calculated as in Figure 1. **b**, ILT7+ NFAT-GFP reporter cells were co-cultured for 18-24 h with HEK-293T cells expressing the indicated BST2 mutants and analyzed by flow cytometry (n=6). Percentage of ILT7 activation was plotted as described in Figure 1. Error bars represent SD. **c**, HEK-293T cells expressing the indicated BST2 mutants were co-cultured with freshly isolated PBMCs and levels of bioactive IFN-I released in supernatants in response to TLR7 agonist was measured 18-24 h later. Results are expressed as relative percentage of IFN-I released by PBMCs in contact with HEK-293T cells transfected with the empty plasmid in presence of TLR 7 agonist (100%, n=12). Statistical significance was determined by applying repeated measures ANOVA with Bonferroni's multiple comparison test. **d**, Putative orientation of residues D129A and R136A extrapolated from the crystal structure of BST2 residues 80–147 published by Hinz, et al.<sup>26</sup>



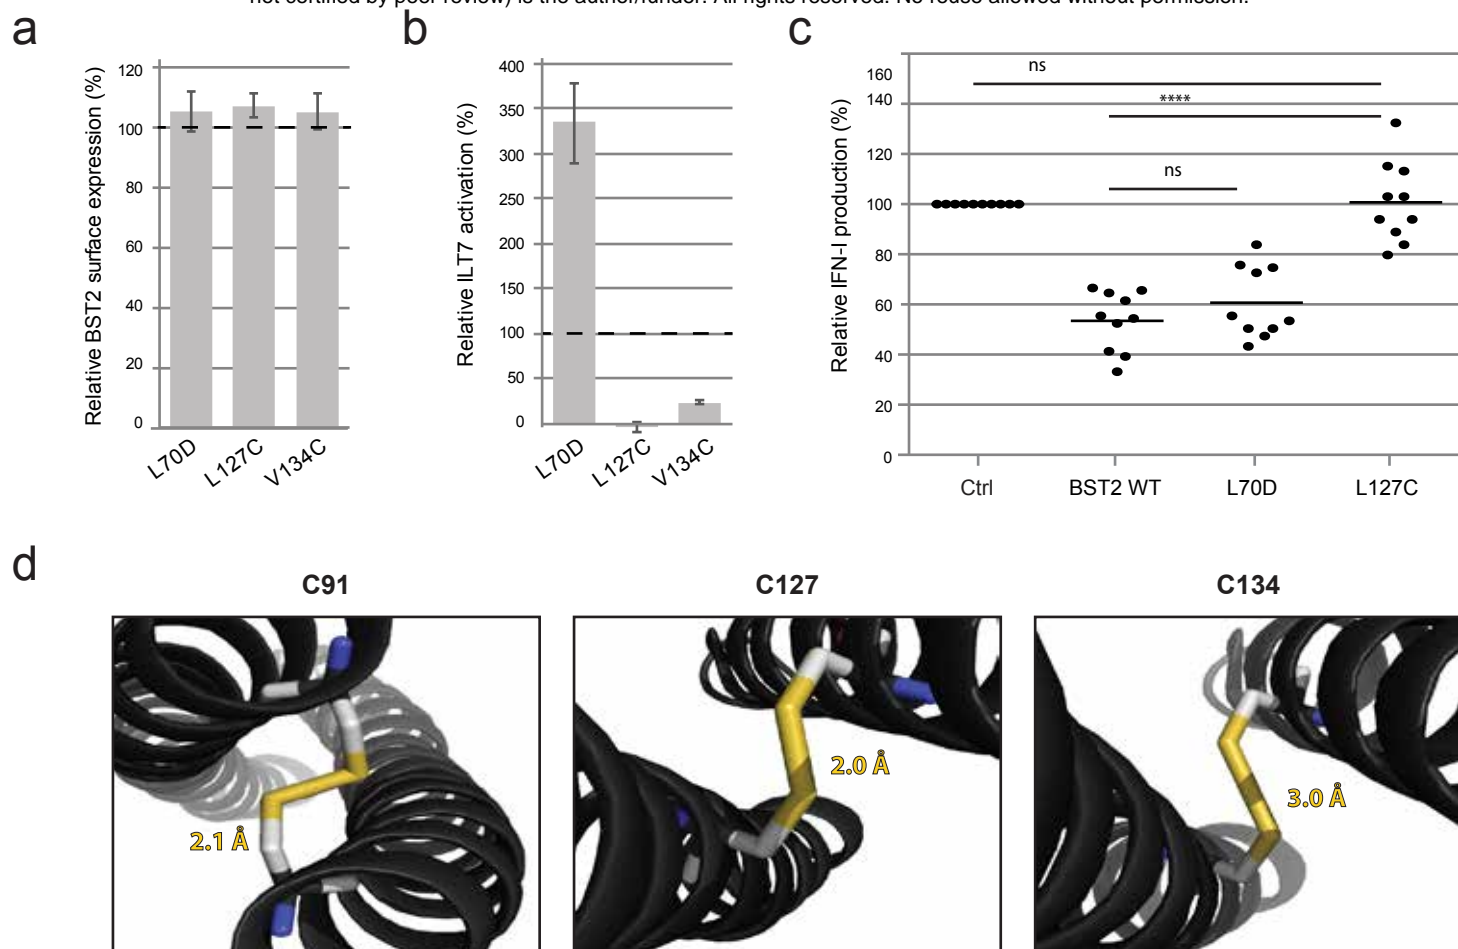

**Fig 4- Effect of BST2 L70D mutation and incorporation of engineered di-sulfide bonds on ILT7 activation. a,** Relative BST2 surface expression in HEK-293T cells transfected with control plasmids or plasmids encoding the indicated BST2 mutants (n=6). Percentages of MFIs were calculated as in Figure 1. **b,** ILT7+ NFAT-GFP reporter cells were co-cultured for 18-24 h with HEK-293T cells expressing the indicated BST2 mutants and analyzed by flow cytometry (n=6). Percentage of ILT7 activation was plotted as described in Figure 1. Error bars represent SD. **c,** Control, BST2 WT or selected mutants (L70D and L127C)-expressing HEK-293T cells were co-cultured with freshly isolated PBMCs and levels of bioactive IFN-I released in supernatants in response to TLR7 agonist was measured as described in Figure 3 (n=10). **d,** Predicted distance between natural cysteine at position 91 on sister BST2 helices as well as between cysteines residues replacing proposed polar dimerization contacts at positions 127 and 134 (in adjacent heptad a positions, see Fig. 2B-C). Cysteine replacement mutations were introduced using Coot and di-sulfide bonds visualized using Pymol. Distances were extrapolated from the crystal structure of BST2 residues 80–147 published by Hinz, et al.<sup>26</sup> The distance between the sulfurs in the disulfide bond in Å is shown for each of the above-mentioned positions.

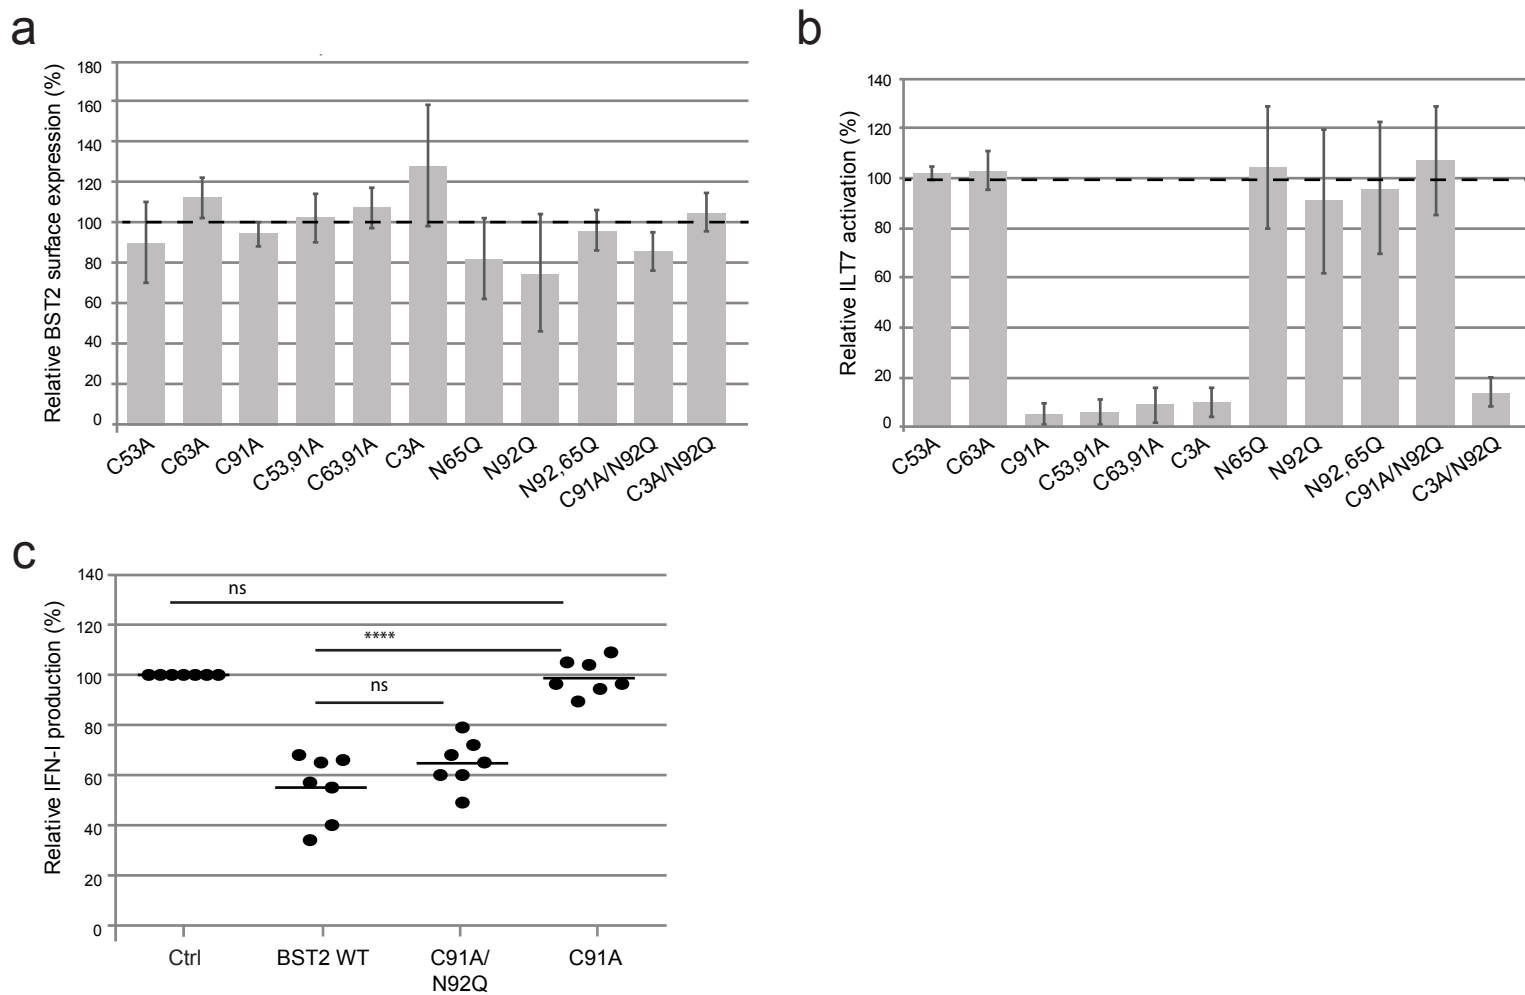

**Fig 5- Role of BST2 cysteine or asparagine residues in ILT7 activation.** **a**, Relative BST2 surface expression in HEK-293T cells transfected with control plasmids or plasmids encoding the indicated BST2 mutants (n=6). Percentages of MFIs were calculated as in Figure 1. **b**, ILT7+ NFAT-GFP reporter cells were co-cultured for 18-24 h with HEK-293T cells expressing the indicated BST2 mutants and analyzed by flow cytometry (n=6). Percentage of ILT7 activation was plotted as described in Figure 1. Error bars represent SD. **c**, Control, BST2 WT or selected mutants-expressing HEK-293T cells were co-cultured with freshly isolated PBMCs and levels of bioactive IFN-I released in supernatants in response to TLR7 agonist was measured as described in Figure 3 (n=7).

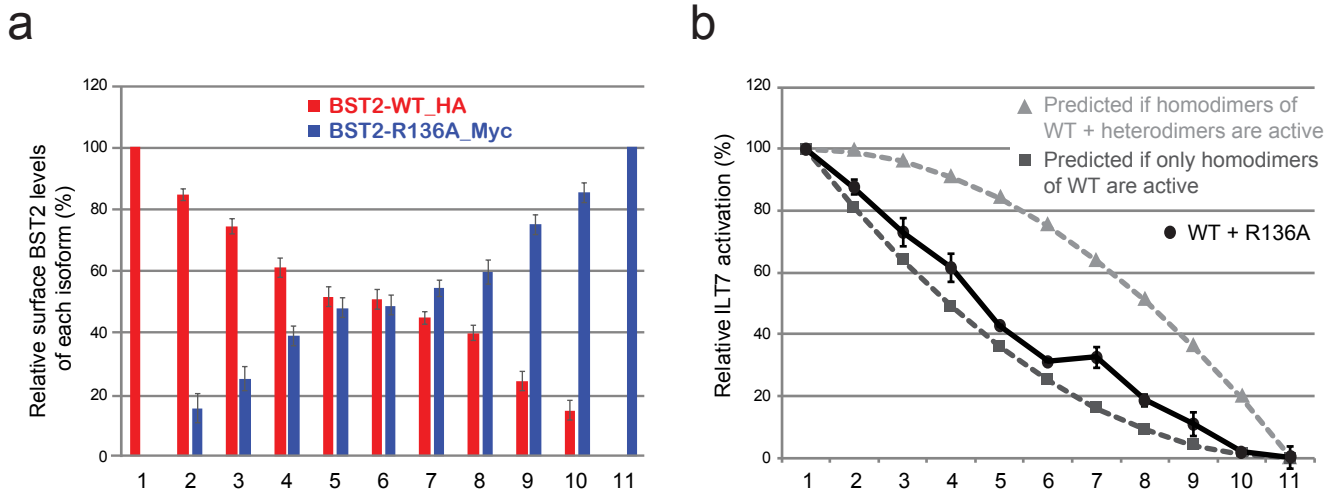

**Fig 6- ILT7 activation in response to different ratios of functional and non-functional BST2 isoforms.** A converging (or double) gradient of expression of HA-BST2 WT and Myc-BST2 R136A was generated in HEK-293T cells such that conditions 1 and 11 represent solely HA-BST2 WT or Myc-BST2 R136A, respectively whereas condition 6 is the mid-point where each isoform is predicted to be at 50%. Total amounts of transfected DNA were identical in all conditions. **a**, Flow cytometry analysis of surface BST2 in HEK-293T cells transfected with conditions 1 to 11 of the above-mentioned converging gradient for HA-BST2 WT (red) and Myc-BST2 R136A (blue). Ratios of each isoform for all conditions are plotted as percentage of total BST2, as calculated in the examples described in Fig. S3. **b**, Relative ILT7 activation from converging BST2 gradient. ILT7+ NFAT-GFP reporter cells were co-cultured for 18-24 h with control (empty) or HEK-293T cells expressing the above-mentioned BST2 gradient for 18-24 h and analyzed by flow cytometry. Percentage of ILT7 activation was plotted as % of GFP+ cells in each condition relative to the HA-BST2 WT condition (100%) after subtracting the % of GFP+ cells in the no BST2 condition (0%). The predicted curves if only homodimers of BST2 WT or if both homodimers of BST2 WT and heterodimers between BST2 WT and R136A were capable of activating ILT7 are indicated in dark grey squares and light grey triangles respectively. The mean values of four independent experiments are plotted and error bars represent SD.

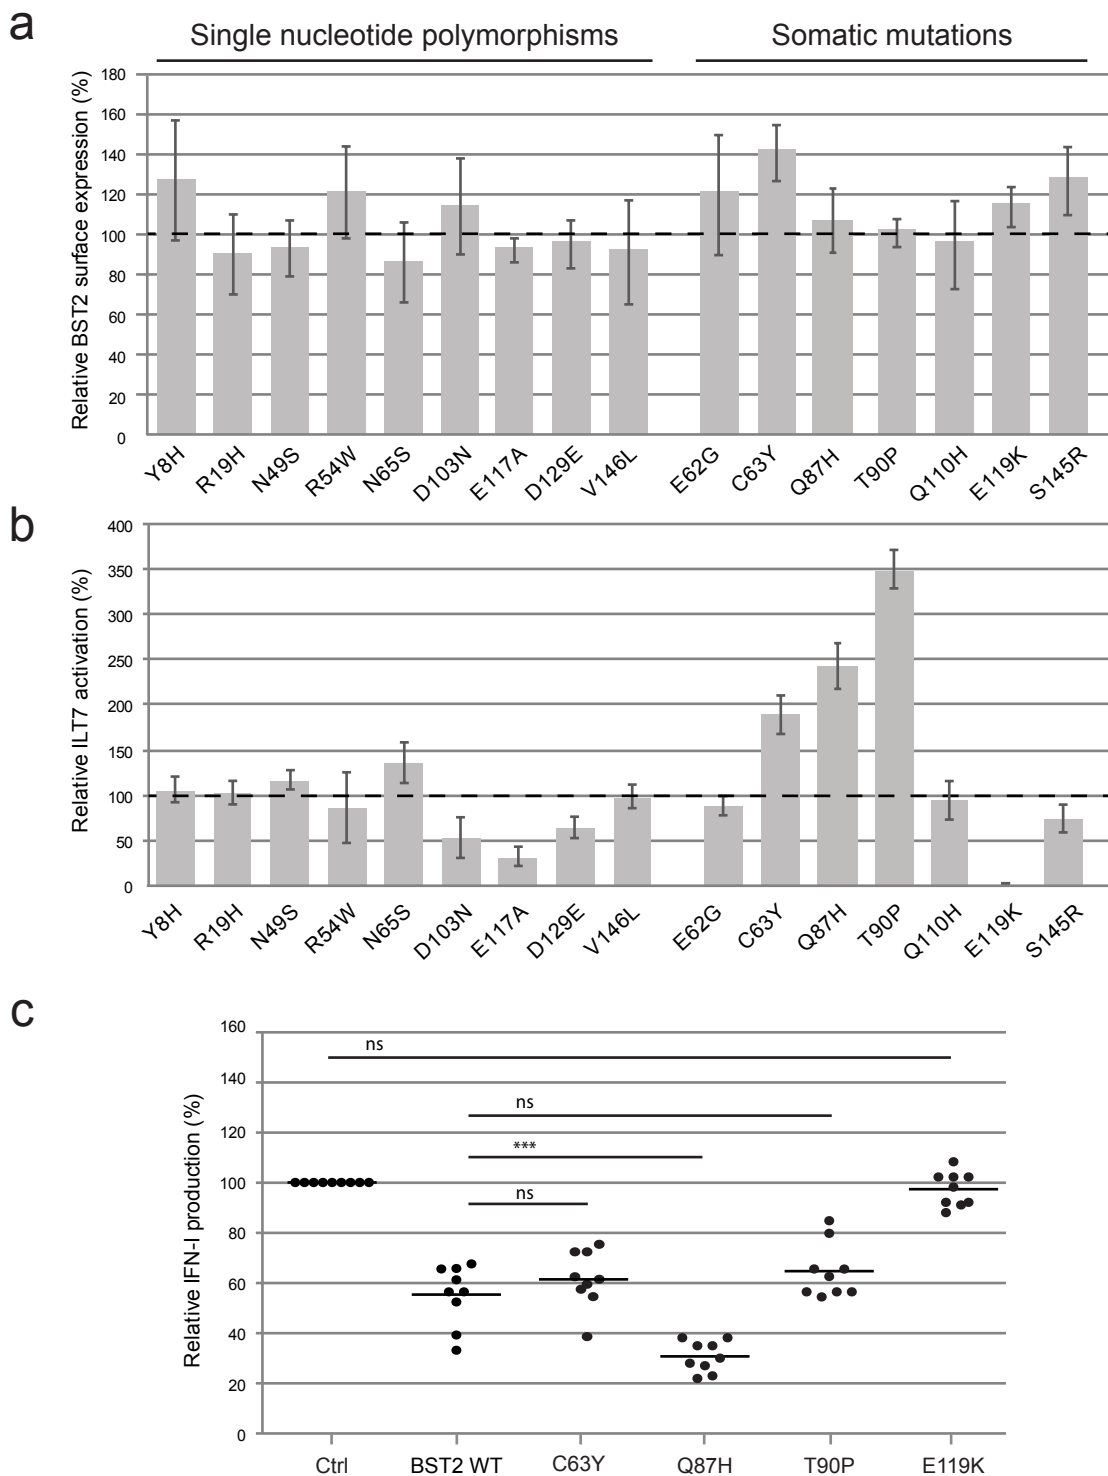

**Fig 7- Effect of natural variants of BST2 on ILT7 activation.** **a**, Relative BST2 surface expression in HEK-293T cells transfected with control plasmids or plasmids encoding the indicated BST2 mutants containing the single nucleotide polymorphisms or somatic mutations described in table S1 (n=6). All Percentages of MFIs were calculated as in Figure 1. **b**, ILT7+ NFAT-GFP reporter cells were co-cultured for 18-24 h with HEK-293T cells expressing the indicated BST2 mutants and analyzed by flow cytometry (n=6). Percentage of ILT7 activation was plotted as described in Figure 1. Error bars represent SD. **c**, Control, BST2 WT or selected mutants-expressing HEK-293T cells were co-cultured with freshly isolated PBMCs and levels of bioactive IFN-I released in supernatants in response to TLR7 agonist was measured as described in Figure 3 (n=9). Statistical significance was determined by applying repeated measures ANOVA with Bonferroni's multiple comparison test was used.

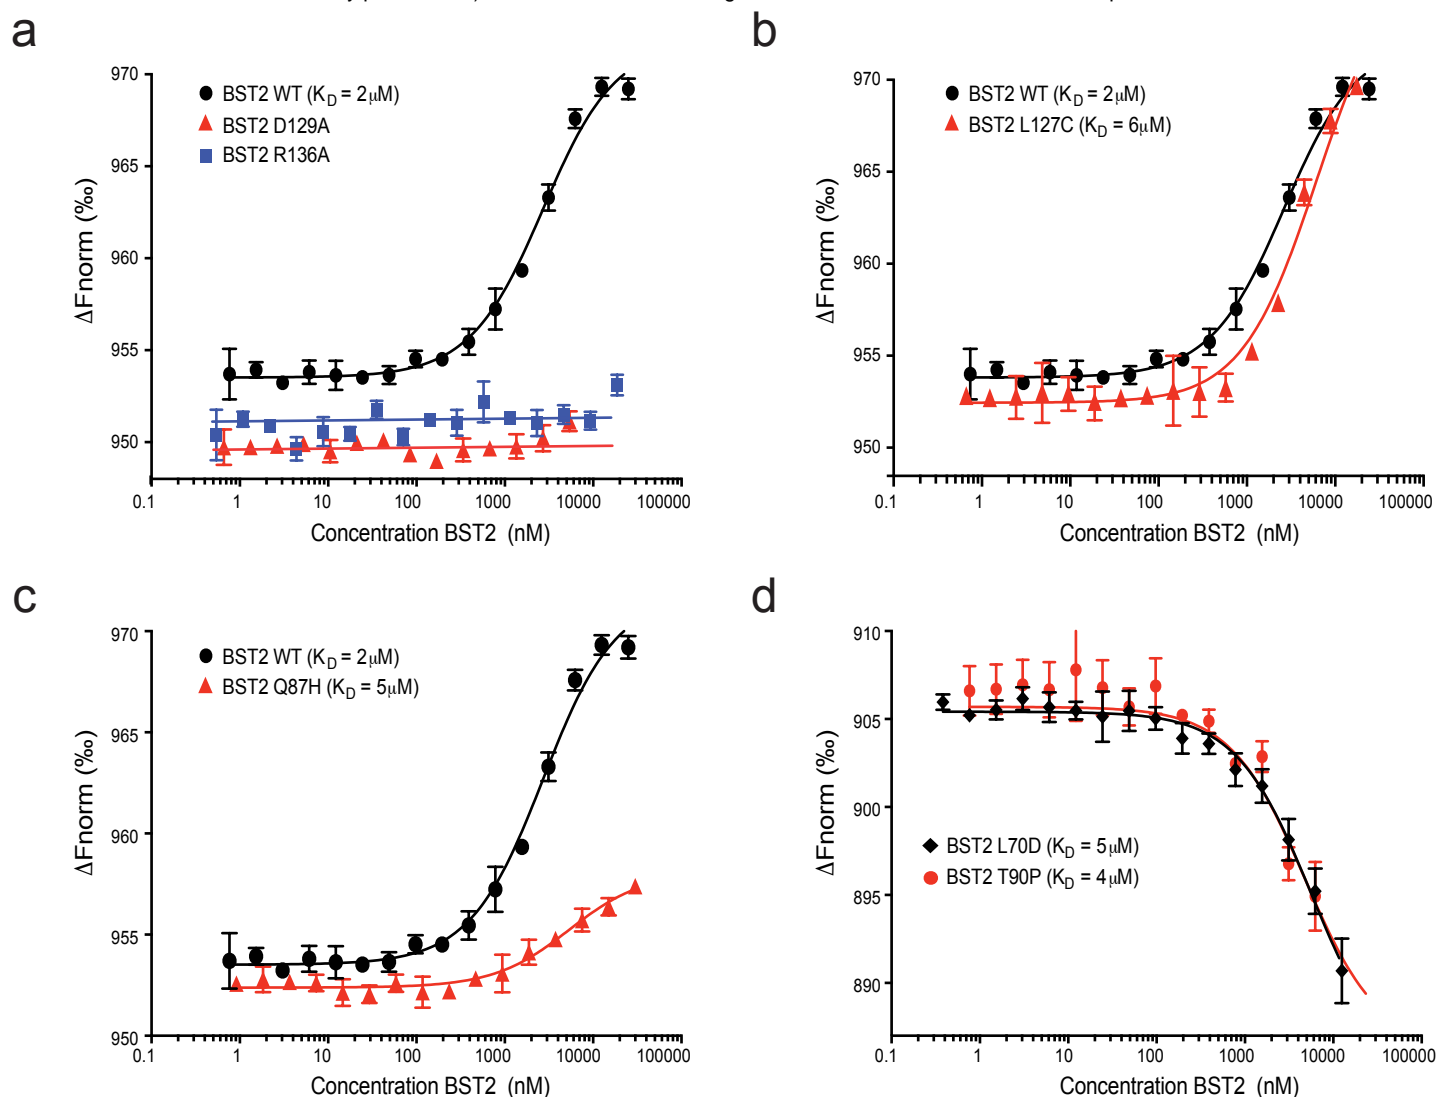

**Fig 8- Thermophoretic analysis of BST2-ILT7 interaction.** A series of 16 dilutions of recombinant BST2 (residues 47-159) WT or mutants were mixed with  $1\mu\text{M}$  of bacILT7 24-223. After 2min incubation the samples were loaded into Monolith NT.115 Capillaries. Dose-response curve of ILT7 towards **a**, BST2 WT or mutants D129A and R136A, **b**, BST2 WT or mutant L127C, **c**, BST2 WT or mutant Q87H, and **d**, mutants L70D and T90P were generated. All experiments were done in triplicates. All resulting dose-response curves were fitted to a one-site binding model to obtain  $K_D$  values (indicated in graphs). Error bars indicate SD. MST experiments were performed at a LED power of 80% and at medium MST power.  $F_{\text{norm}}$  = normalized fluorescence.
